# Supplementary material for: Palladium-catalyzed Suzuki cross-couplings of N′-mesyl arylhydrazines via C–N bond cleavage
Source: Royal Society of Chemistry journal article supplement (doi:10.1039/c4ra03421j), 2014-01-01

# **Palladium-catalyzed Suzuki cross-couplings of *N*'-mesyl arylhydrazines via C–N bond cleavage†**

**He-Ping Zhou,<sup>a</sup> Jin-Biao Liu,<sup>\*a,b</sup> Jian-Jun Yuan<sup>a</sup> and Yi-Yuan Peng<sup>\*a</sup>**

<sup>a</sup> Key Laboratory of Green Chemistry, Jiangxi Province and College of Chemistry & Chemical Engineering, Jiangxi Normal University, Nanchang 330022, Jiangxi, PR China. E-mail: [liujbgood@hotmail.com](mailto:liujbgood@hotmail.com) (J.-B. Liu); [yyuanpeng@yahoo.com](mailto:yyuanpeng@yahoo.com) (Y.-Y. Peng)

<sup>b</sup> School of Metallurgy and Chemical Engineering, Jiangxi University of Science and Technology, 86 Hongqi Road, Ganzhou 341000, Jiangxi, PR China.

## **Supporting Information**

- 1. General procedures**
- 2. Typical procedure for Suzuki cross-coupling of *N*'-mesyl arylhydrazines with aryl boronic acids**
- 3. Characterization of the products**
- 4. NMR spectra of the compounds**

## 1. General procedures

The solvents were distilled from standard drying agents. Unless otherwise stated, commercial reagents purchased from Alfa Aesar, Acros and Aldrich chemical companies were used without further purification. Purification of reaction products was carried out by flash chromatography using Qing Dao Sea Chemical Reagent silica gel (200–300 mesh). <sup>1</sup>H NMR spectra were recorded on a Bruker Avance III 400 (400 MHz) spectrometer and referenced internally to the residual proton resonance in CDCl<sub>3</sub> ( $\delta$  = 7.26 ppm), or with tetramethylsilane (TMS,  $\delta$  = 0.00 ppm) as the internal standard. Chemical shifts were reported as parts per million (ppm) in the  $\delta$  scale downfield from TMS. Multiplicity is indicated as follows: s (singlet), d (doublet), t (triplet), q (quartet), quint (quintet), m (multiplet), dd (doublet of doublet), bs (broad singlet). <sup>13</sup>C NMR spectra were recorded on Bruker spectrometer with complete proton decoupling, and chemical shifts were reported in ppm from TMS with the solvent as the internal reference (CDCl<sub>3</sub>,  $\delta$  = 77.0 ppm). Analytical TLC was performed using EM separations percolated silica gel 0.2 mm layer UV 254 fluorescent sheets.

## 2 Typical procedure for Pd-catalyzed Suzuki cross-coupling of arylhydrazines with aryl boronic acids

A mixture of *N*-mesyl arylhydrazines **1** (0.30 mmol), aryl boronic acid **2** (0.36 mmol, 1.2 equiv.), K<sub>2</sub>CO<sub>3</sub> (0.6 mmol, 2.0 equiv.), and PdCl<sub>2</sub>(PPh<sub>3</sub>)<sub>2</sub> (0.015 mmol, 5 mol %) was stirred at 60 °C in MeOH (2.0 mL) for 4-8 h under air. After completion of the reaction (indicated by TLC), the mixture was quenched with saturated NaCl solution, extracted by EtOAc, and dried with Na<sub>2</sub>SO<sub>4</sub>. The crude product was purified by flash column chromatography to provide the corresponding product **3**.

## 3. Characterization of the products

### 4-Methoxybiphenyl<sup>[1]</sup>

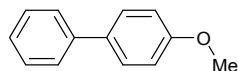

White solid; mp: 90-91 °C; <sup>1</sup>H NMR (400 MHz, CDCl<sub>3</sub>):  $\delta$  7.57-7.52 (m, 4H), 7.42 (t,  $J$  = 7.6 Hz, 2H), 7.31 (t,  $J$  = 7.2 Hz, 1H), 6.99 (d,  $J$  = 7.2 Hz, 2H), 3.86 (s, 3H); <sup>13</sup>C NMR (101 MHz, CDCl<sub>3</sub>):  $\delta$  159.19, 140.85, 133.83, 128.69, 128.13, 126.72, 126.63, 114.23, 55.33.

### 2-Methoxybiphenyl<sup>[2]</sup>

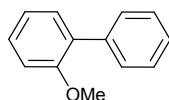

White solid; mp: 31-32 °C; <sup>1</sup>H NMR (400 MHz, CDCl<sub>3</sub>):  $\delta$  7.56 (d,  $J$  = 7.2 Hz, 2H), 7.44 (t,  $J$  = 7.6 Hz, 2H), 7.37-7.33 (m, 3H), 7.06 (t,  $J$  = 7.2 Hz, 1H), 7.01 (d,  $J$  = 8.4 Hz, 1H), 3.83 (s, 3H); <sup>13</sup>C NMR (101 MHz, CDCl<sub>3</sub>):  $\delta$  156.50, 138.58, 130.91, 130.78, 129.56, 128.62, 127.98, 126.92,

120.85, 111.29, 55.57.

### 5-phenylbenzo[d][1,3]dioxole<sup>[3]</sup>

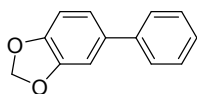

Yellow solid; mp: 81-83 °C; <sup>1</sup>H NMR (400 MHz, CDCl<sub>3</sub>): δ 7.53 (d, *J* = 7.2 Hz, 2H), 7.43 (t, *J* = 7.6 Hz, 2H), 7.34 (d, *J* = 7.2 Hz, 1H), 7.08 (d, *J* = 8.8 Hz, 2H), 6.90 (d, *J* = 8.0 Hz, 1H), 6.01 (s, 2H); <sup>13</sup>C NMR (101 MHz, CDCl<sub>3</sub>): δ 148.13, 147.08, 140.96, 135.65, 128.74, 126.94, 126.90, 120.64, 108.58, 107.70, 101.14.

### 3,5-Dimethylbiphenyl<sup>[4]</sup>

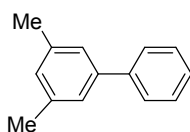

Colorless oil; <sup>1</sup>H NMR (400 MHz, CDCl<sub>3</sub>): δ 7.58 (t, *J* = 8.0 Hz, 2H), 7.41 (t, *J* = 8.0 Hz, 2H), 7.32 (d, *J* = 8.0 Hz, 1H), 7.21 (s, 2H), 6.99 (s, 1H), 2.37 (s, 6H); <sup>13</sup>C NMR (101 MHz, CDCl<sub>3</sub>): δ 141.53, 141.32, 138.26, 128.92, 128.66, 127.22, 127.10, 125.15, 21.43.

### Biphenyl<sup>[1]</sup>

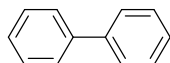

White solid; mp: 68-69 °C; <sup>1</sup>H NMR (400 MHz, CDCl<sub>3</sub>): δ 7.62 (d, *J* = 7.2 Hz, 4H), 7.47 (t, *J* = 7.6 Hz, 4H), 7.37 (t, *J* = 7.2 Hz, 2H); <sup>13</sup>C NMR (101 MHz, CDCl<sub>3</sub>): δ 141.23, 128.72, 127.22, 127.14.

### 4-Chlorobiphenyl<sup>[5]</sup>

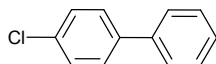

White solid; mp: 31-32 °C; <sup>1</sup>H NMR (400 MHz, CDCl<sub>3</sub>): δ 7.54 (dd, *J* = 14.0, 8.0 Hz, 4H), 7.47-7.43 (m, 3H), 7.40-7.35 (m, 2H); <sup>13</sup>C NMR (101 MHz, CDCl<sub>3</sub>): δ 140.02, 139.70, 133.41, 128.93, 128.90, 128.41, 127.61, 127.01.

### 3-Chlorobiphenyl<sup>[6]</sup>

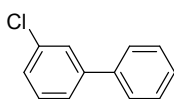

White solid; mp: 45-47 °C; <sup>1</sup>H NMR (400 MHz, CDCl<sub>3</sub>): δ 7.60 -7.57 (m, 3H), 7.48 - 7.34 (m, 6H). <sup>13</sup>C NMR (101 MHz, CDCl<sub>3</sub>): δ 143.11, 139.84, 134.68, 130.14, 129.99, 128.91, 127.88, 127.28, 127.13, 125.32.

### 3,5-Dichlorobiphenyl<sup>[7]</sup>

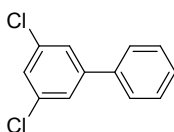

White solid; mp: 61-62 °C; <sup>1</sup>H NMR (400 MHz, CDCl<sub>3</sub>): δ 7.53 (d, *J* = 7.6 Hz, 2H), 7.43 (dt, *J* = 8.8, 4.4 Hz, 5H), 7.34 (s, 1H); <sup>13</sup>C NMR (101 MHz, CDCl<sub>3</sub>): δ 148.13, 147.08, 140.96, 135.65, 128.74, 126.94, 126.90, 120.64, 108.58, 107.70, 101.14.

#### 4-Fluorobiphenyl<sup>[8]</sup>

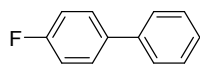

White solid; mp: 72-73 °C; <sup>1</sup>H NMR (400 MHz, CDCl<sub>3</sub>): δ 7.57-7.55 (m, 4H), 7.46 (t, *J* = 7.2 Hz, 2H), 7.38 (d, *J* = 6.8 Hz, 1H), 7.15 (t, *J* = 8.6 Hz, 2H); <sup>13</sup>C NMR (101 MHz, CDCl<sub>3</sub>): δ 162.69 (d, *J* = 247.45 Hz), 139.26, 136.36, 127.79, 127.71 (d, *J* = 8.08 Hz), 126.23, 126.00, 114.69 (d, *J* = 21.21 Hz).

#### 3,5-Difluorobiphenyl<sup>[9]</sup>

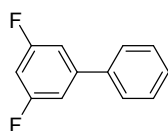

White solid; mp: 72-73 °C; <sup>1</sup>H NMR (400 MHz, CDCl<sub>3</sub>): δ 7.55 (d, *J* = 6.8 Hz, 1H), 7.47-7.40 (m, 2H), 7.08 (dd, *J* = 16.4, 6.0 Hz, 3H), 6.87-6.78 (m, 2H); <sup>13</sup>C NMR (101 MHz, CDCl<sub>3</sub>): δ 164.66 (dd, *J* = 248.46 Hz), 144.61 (t, *J* = 9.49 Hz), 138.93, 129.02, 128.46, 127.01, 110.07 (dd, *J* = 19.19 Hz), 102.73 (t, *J* = 25.25 Hz).

#### Biphenyl-4-carbonitrile<sup>[3]</sup>

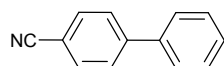

White solid; mp: 85-86 °C; <sup>1</sup>H NMR (400 MHz, CDCl<sub>3</sub>): δ 7.70 (q, *J* = 8.4 Hz, 4H), 7.59 (d, *J* = 7.2 Hz, 2H), 7.49 (t, *J* = 7.6 Hz, 2H), 7.44 (d, *J* = 7.2 Hz, 1H); <sup>13</sup>C NMR (101 MHz, CDCl<sub>3</sub>): δ 145.70, 139.20, 132.60, 129.12, 128.67, 127.74, 127.24, 118.93, 110.95.

#### 1-(Biphenyl-4-yl)ethanone<sup>[3]</sup>

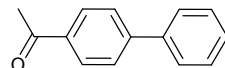

White solid; mp: 152-153 °C; <sup>1</sup>H NMR (400 MHz, CDCl<sub>3</sub>): δ 8.03 (d, *J* = 8.4 Hz, 2H), 7.69 (d, *J* = 8.4 Hz, 2H), 7.63 (d, *J* = 7.2 Hz, 2H), 7.47 (t, *J* = 7.2 Hz, 2H), 7.41 (d, *J* = 7.2 Hz, 1H), 2.64 (s, 3H); <sup>13</sup>C NMR (101 MHz, CDCl<sub>3</sub>): δ 197.85, 145.82, 139.89, 135.86, 128.97, 128.93, 128.25, 127.28, 127.25, 26.67.

#### Methyl biphenyl-4-carboxylate<sup>[3]</sup>

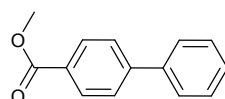

White solid; mp: 120-121 °C; <sup>1</sup>H NMR (400 MHz, CDCl<sub>3</sub>): δ 8.11 (d, *J* = 8.8 Hz, 2H), 7.65 (dd, *J* = 15.2, 7.2 Hz, 4H), 7.47 (t, *J* = 7.6 Hz, 2H), 7.40 (t, *J* = 7.2 Hz, 1H), 3.94 (s, 3H). <sup>13</sup>C NMR (101 MHz, CDCl<sub>3</sub>): δ 167.01, 145.66, 140.03, 130.10, 128.92, 128.13, 127.28, 127.05, 52.10.

#### 3-Nitrobiphenyl<sup>[5]</sup>

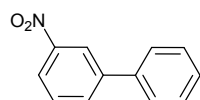

Yellow solid; mp: 59-60 °C; <sup>1</sup>H NMR (400 MHz, CDCl<sub>3</sub>): δ 8.46 (s, 1H), 8.21 (d, *J* = 8.2 Hz, 1H), 7.92 (d, *J* = 7.2 Hz, 1H), 7.64-7.60 (m, 3H), 7.50 (t, *J* = 7.2 Hz, 2H), 7.44 (d, *J* = 7.2 Hz, 1H); <sup>13</sup>C NMR (101 MHz, CDCl<sub>3</sub>): δ 148.75, 142.91, 138.69, 133.06, 129.72, 129.18, 128.56, 127.18, 122.05, 122.01.

### 1-Phenylnaphthalene<sup>[3]</sup>

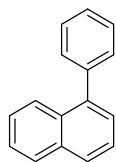

Colorless oil; <sup>1</sup>H NMR (400 MHz, CDCl<sub>3</sub>): δ 7.93 (d, *J* = 9.2 Hz, 2H), 7.88 (d, *J* = 8.4 Hz, 1H), 7.55-7.50 (m, 6H), 7.47-7.45 (m, 3H); <sup>13</sup>C NMR (101 MHz, CDCl<sub>3</sub>): δ 140.84, 140.33, 133.87, 131.70, 130.13, 128.31, 127.68, 127.28, 126.97, 126.09, 126.07, 125.81, 125.42.

### 4-Methoxy-4'-methylbiphenyl<sup>[1]</sup>

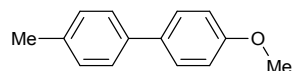

White solid; mp: 107-108 °C; <sup>1</sup>H NMR (400 MHz, CDCl<sub>3</sub>): δ 7.54 (d, *J* = 8.4 Hz, 2H), 7.48 (d, *J* = 8.0 Hz, 2H), 7.25 (d, *J* = 8.0 Hz, 2H), 6.99 (d, *J* = 8.4 Hz, 2H), 3.87 (s, 3H), 2.41 (s, 3H). <sup>13</sup>C NMR (101 MHz, CDCl<sub>3</sub>): δ 158.94, 137.98, 136.35, 133.76, 129.43, 127.95, 126.58, 114.17, 55.34, 21.04.

### 4, 4'-Dimethoxybiphenyl<sup>[1]</sup>

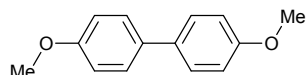

White solid; mp: 168-169 °C; <sup>1</sup>H NMR (400 MHz, CDCl<sub>3</sub>): δ 7.48 (d, *J* = 8.8 Hz, 4H), 6.96 (d, *J* = 8.8 Hz, 4H), 3.84 (s, 6H). <sup>13</sup>C NMR (101 MHz, CDCl<sub>3</sub>): δ 158.72, 133.51, 127.74, 114.18, 55.35.

### 4'-Methoxy-2-methylbiphenyl<sup>[2]</sup>

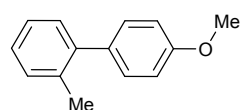

White solid; mp: 52-53 °C; <sup>1</sup>H NMR (400 MHz, CDCl<sub>3</sub>): δ 7.26-7.22 (m, 6H), 6.96-6.94 (m, 2H), 3.85 (s, 3H), 2.28 (s, 3H). <sup>13</sup>C NMR (101 MHz, CDCl<sub>3</sub>): δ 158.54, 141.58, 135.50, 134.41, 130.29, 130.26, 129.91, 126.97, 125.75, 113.51, 55.30, 20.54.

### 4-Chloro-4'-methoxybiphenyl<sup>[2]</sup>

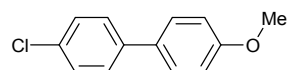

White solid; mp: 110-111 °C; <sup>1</sup>H NMR (400 MHz, CDCl<sub>3</sub>): δ 7.49-7.46 (m, 4H), 7.38-7.36 (m, 2H), 6.98-6.96 (m, 2H), 3.85 (s, 3H). <sup>13</sup>C NMR (101 MHz, CDCl<sub>3</sub>): δ 159.36, 139.27, 132.66, 132.50, 128.81, 127.99, 127.91, 114.30, 55.35.

### 4-Fluoro-4'-methoxybiphenyl<sup>[8]</sup>

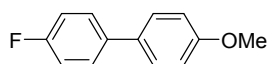

White solid; mp: 84-86 °C; <sup>1</sup>H NMR (400 MHz, CDCl<sub>3</sub>): δ 7.51-7.46 (m, 4H), 7.10 (t, *J* = 8.8 Hz, 2H), 6.98 (d, *J* = 8.8 Hz, 2H), 3.85 (s, 3H). <sup>13</sup>C NMR (101 MHz, CDCl<sub>3</sub>): δ 163.35 (d, *J* = 246.34 Hz), 159.16, 137.02 (d, *J* = 3.03 Hz), 132.87, 128.26 (d, *J* = 8.10 Hz), 128.04, 115.64 (d, *J* = 21.21 Hz), 114.29, 55.35.

### 4-Methoxy-4'-nitrobiphenyl<sup>[1]</sup>

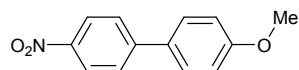

Yellow solid; mp: 104-105 °C; <sup>1</sup>H NMR (400 MHz, CDCl<sub>3</sub>): δ 8.28 (d, *J* = 8.8 Hz, 2H), 7.70 (d, *J* = 8.8 Hz, 2H), 7.59 (d, *J* = 8.8 Hz, 2H), 7.03 (d, *J* = 8.8 Hz, 2H), 3.88 (s, 3H). <sup>13</sup>C NMR (101 MHz, CDCl<sub>3</sub>): δ 160.49, 147.23, 146.59, 131.11, 128.58, 127.09, 124.16, 114.64, 55.44.

#### Reference

- [1] L. Liu, Y. Zhang and Y. Wang, *J. Org. Chem.*, 2005, **70**, 6122.
- [2] L. Ackermann and A. Althammer, *Org. Lett.*, 2006, **8**, 3457.
- [3] H. Chen, Z. Huang, X. Hu, G. Tang, P. Xu, Y. Zhao and C. H. Cheng, *J. Org. Chem.*, 2011, **76**, 2338.
- [4] M. Shi and H. X. Qian, *Tetrahedron*, 2005, **61**, 4949.
- [5] S. Shi and Y. Zhang, *J. Org. Chem.*, 2007, **72**, 5927.
- [6] K. Karami, C. Rizzoli and M. M. Salah, *J. Organomet. Chem.*, 2011, **696**, 940.
- [7] A. Löbber, S. P. Kitney, S. M. Kelly, M. O'Neill and T. Stirner, *Liq. Cryst.*, 2007, **34**, 1357.
- [8] J. Masllorens, I. González and A. Roglans, *Eur. J. Org. Chem.*, 2007, 158.
- [9] A. S. Demir, H. Findik, N. Saygili and N. Tuna Subasi, *Tetrahedron*, 2010, **66**, 1308.

## 4. NMR spectra of the compounds

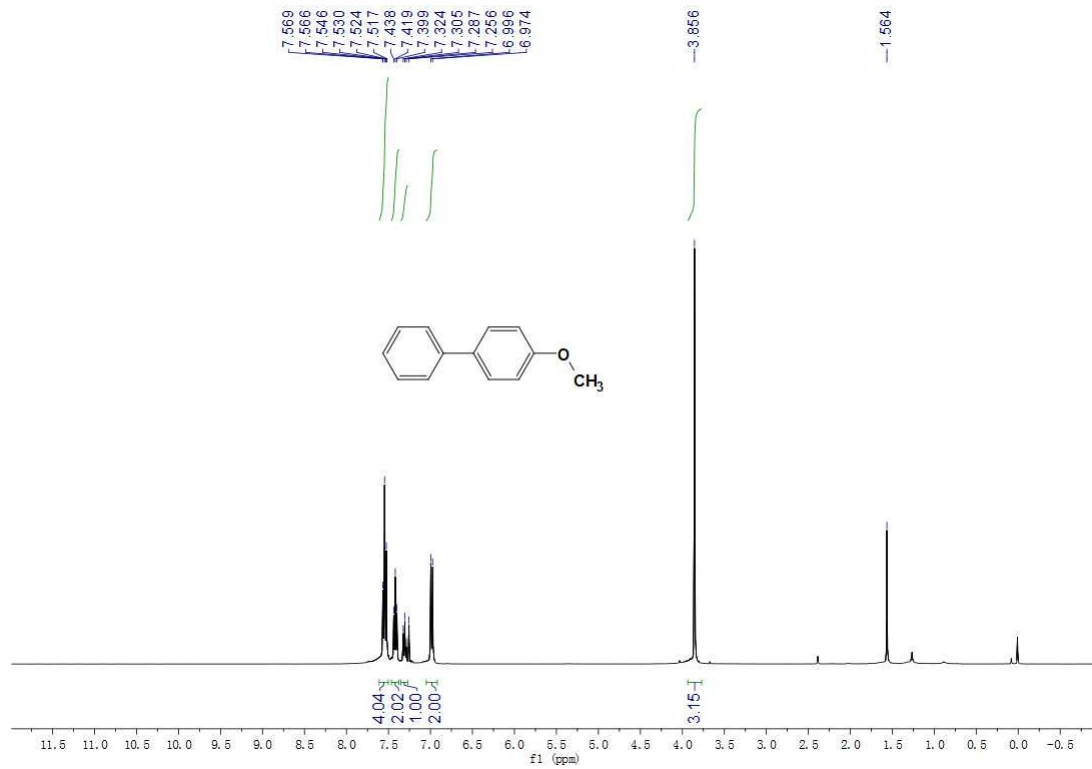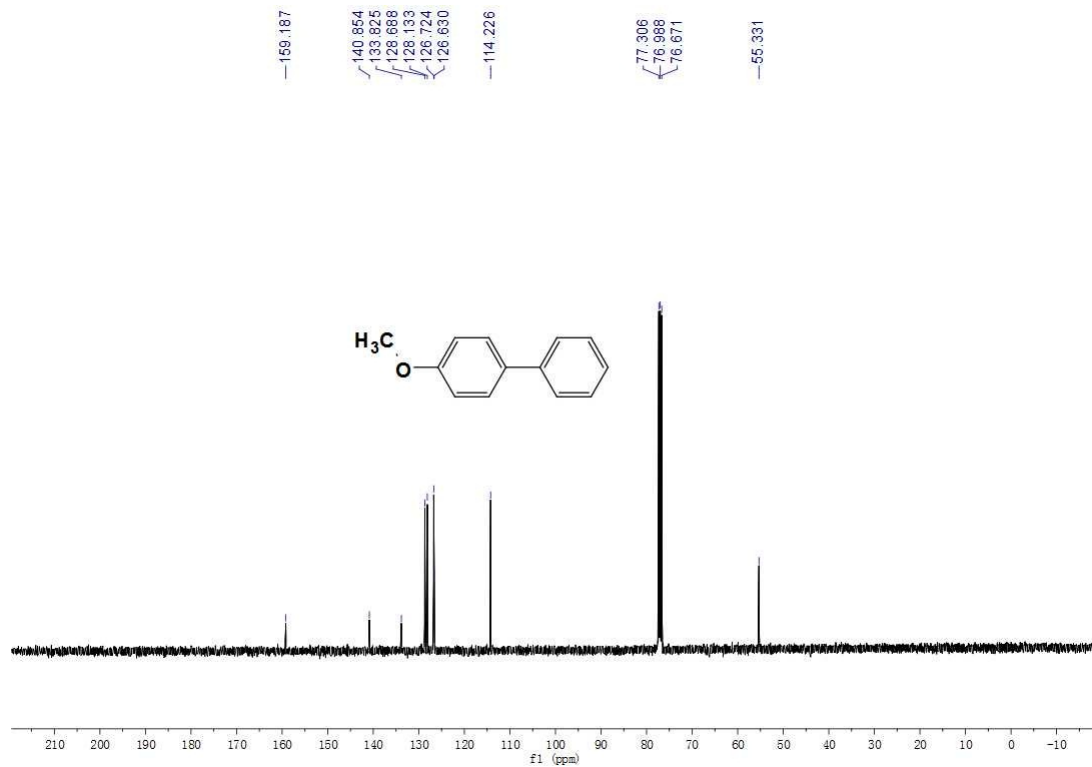

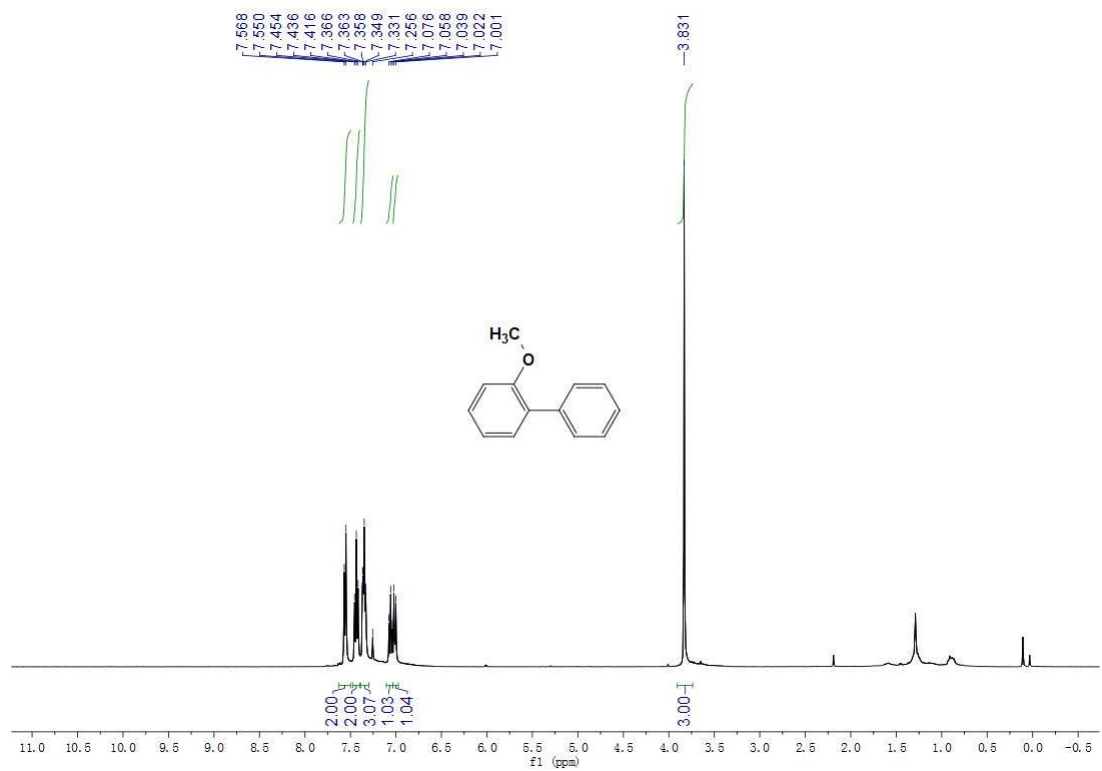

Desktop  
zhp-2-32-1

156.604  
138.579  
130.909  
130.779  
129.661  
128.618  
127.985  
126.917  
120.852  
111.289  
77.355  
77.036  
76.720  
55.575

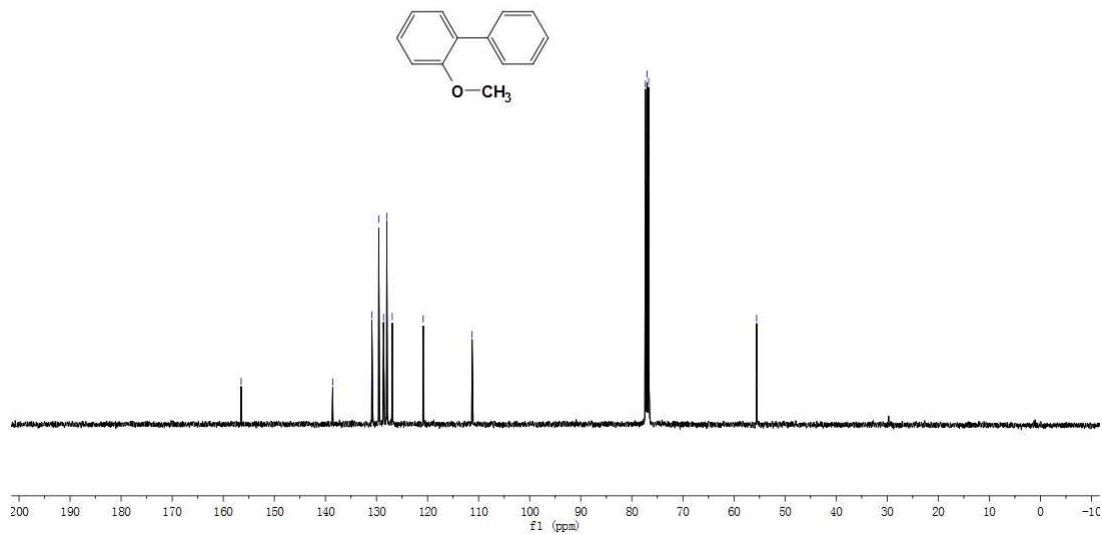



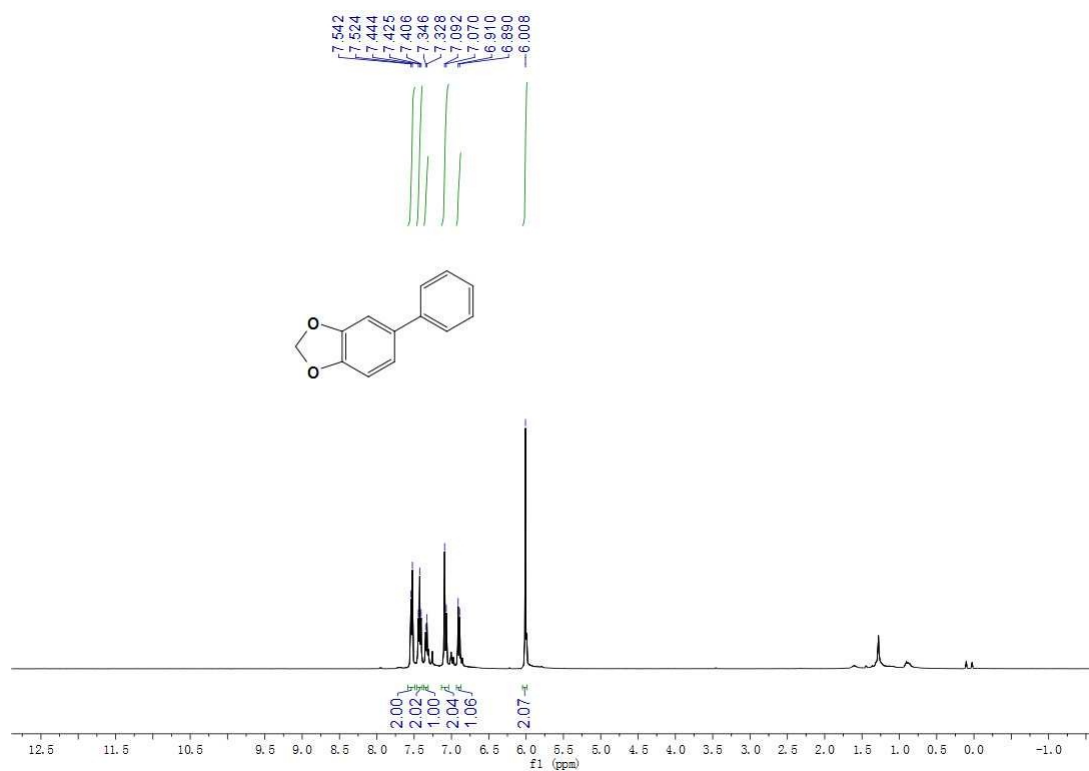

Desktop  
zhp-2-46-1

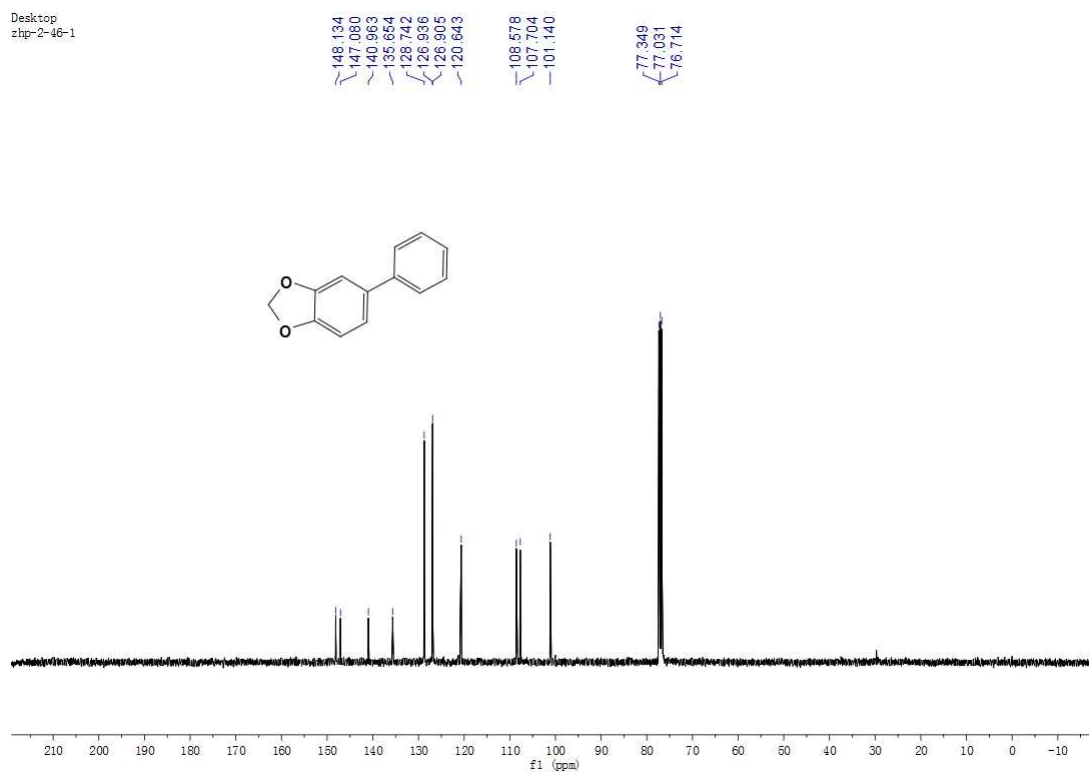

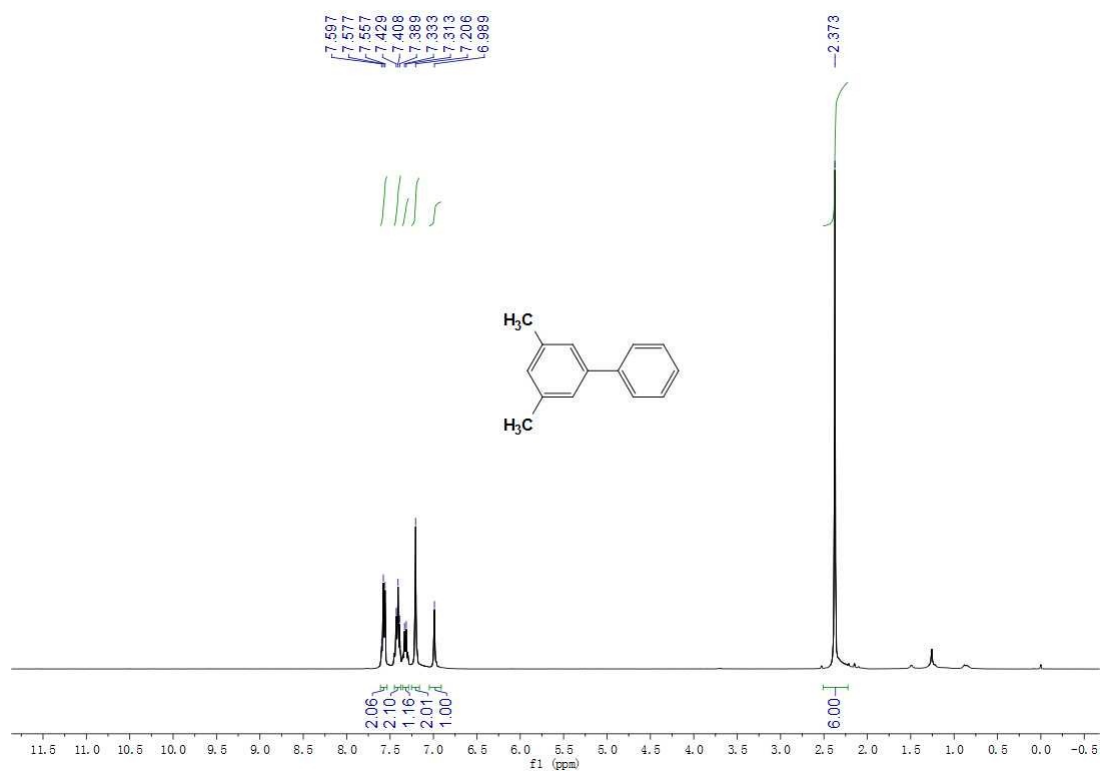

Desktop  
zhp-2-31-1

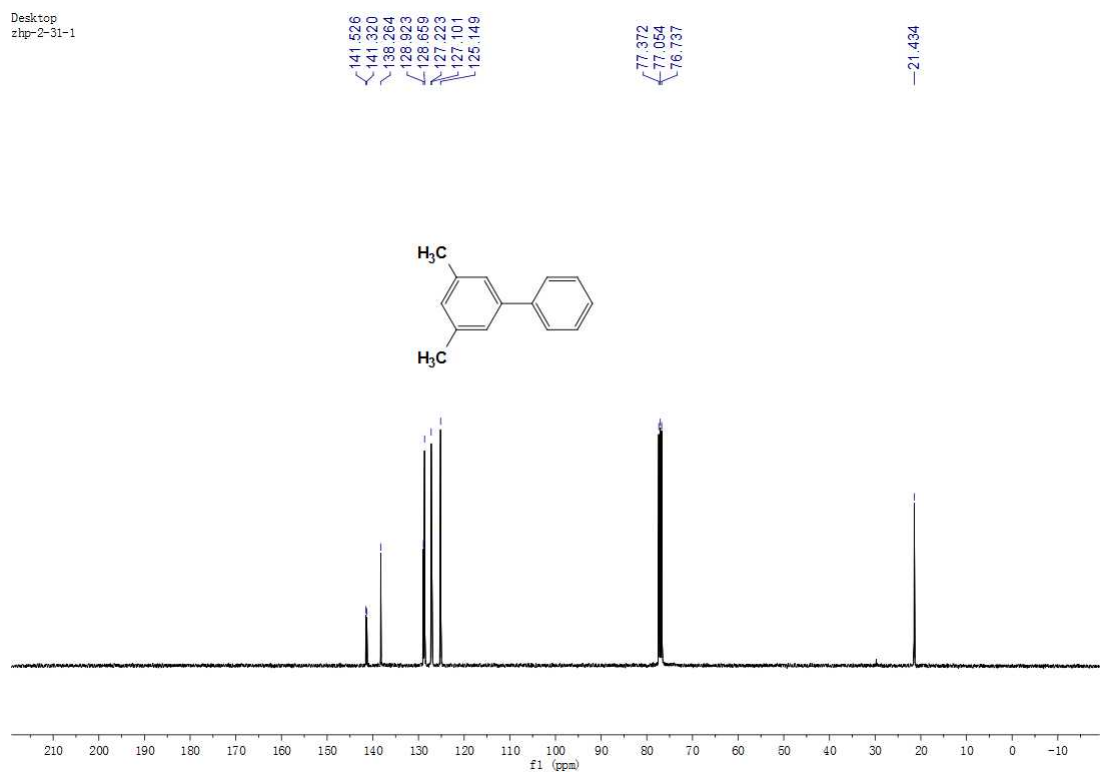

zhp  
zhp-2-24-1

7.632  
7.614  
7.485  
7.467  
7.448  
7.390  
7.371  
7.353  
7.286

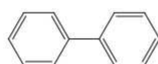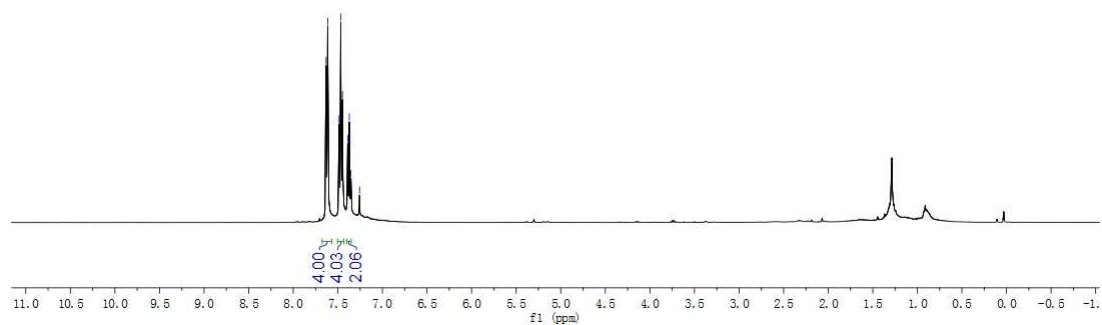

141.228  
128.723  
127.221  
127.143  
77.305  
76.987  
76.670

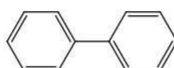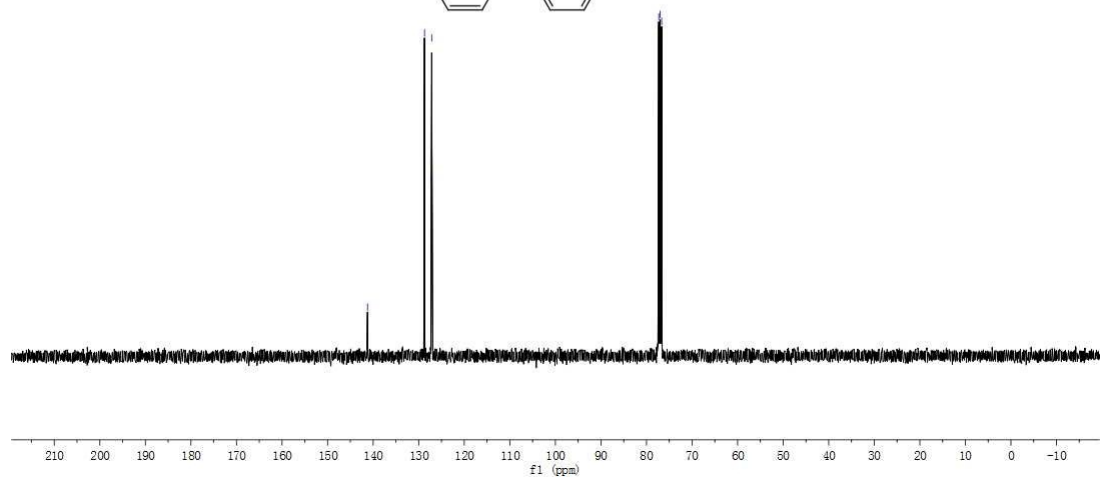

zhp  
zhp-2-34-1

7.573  
7.554  
7.538  
7.517  
7.472  
7.454  
7.434  
7.427  
7.406  
7.390  
7.371  
7.354  
7.256

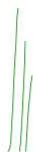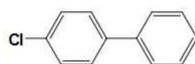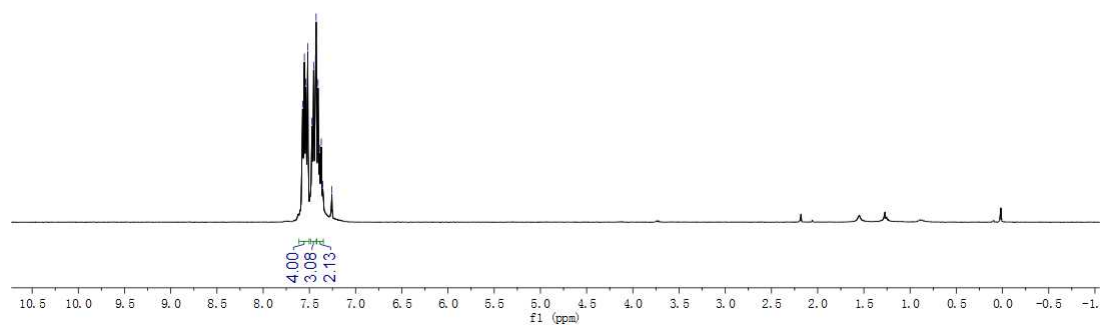

zhouheping  
zhp-3-34-1

140.021  
139.700  
133.407  
128.927  
128.901  
128.410  
127.608  
127.006

77.363  
77.045  
76.728

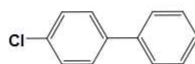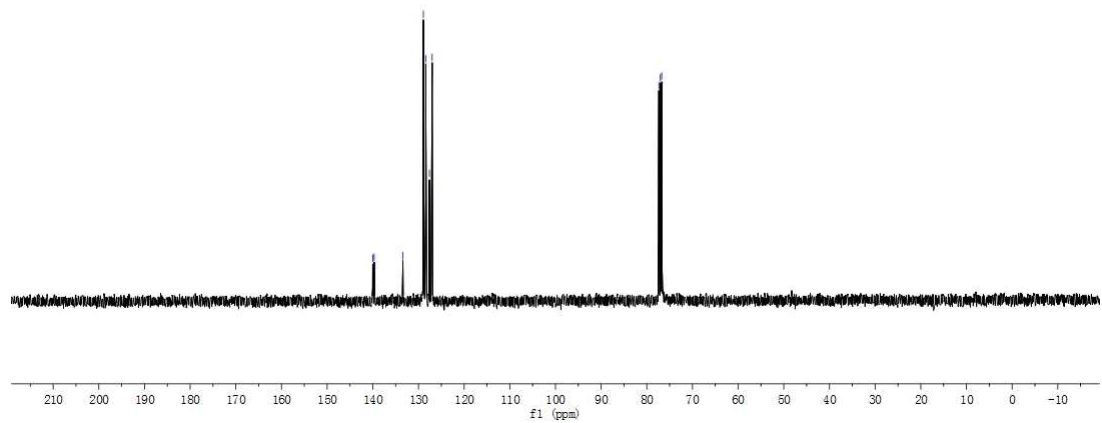

zhp  
zhp-2-33-1

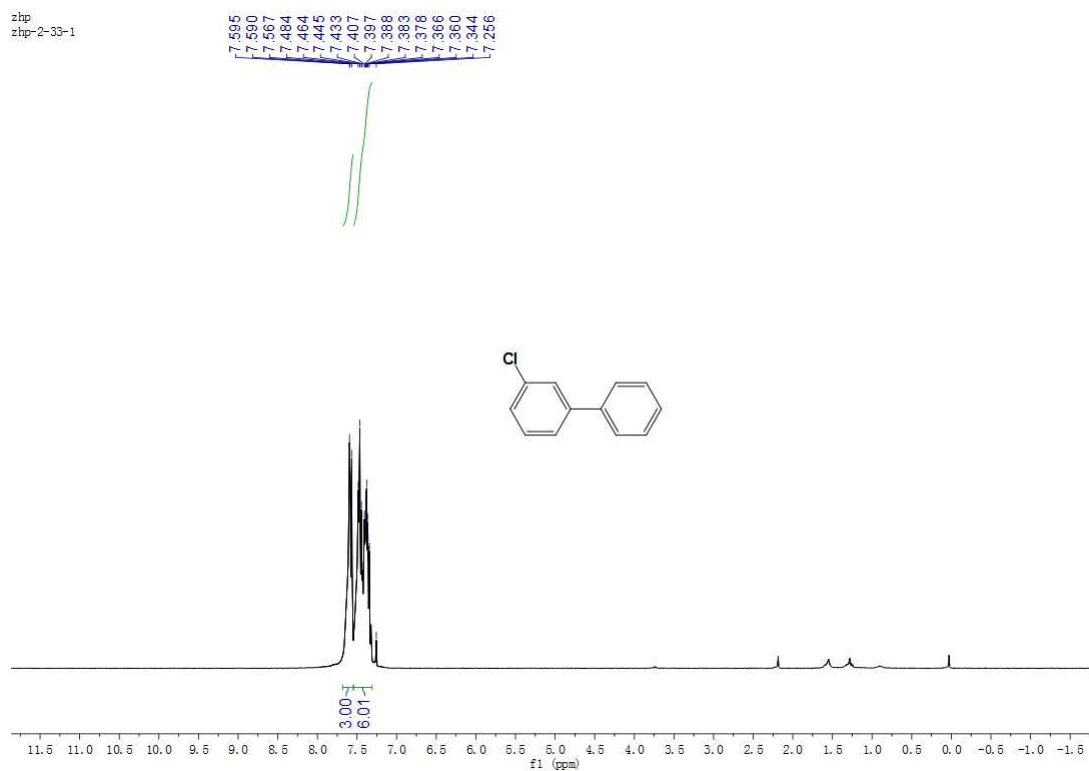

Desktop  
zhp-2-33-1

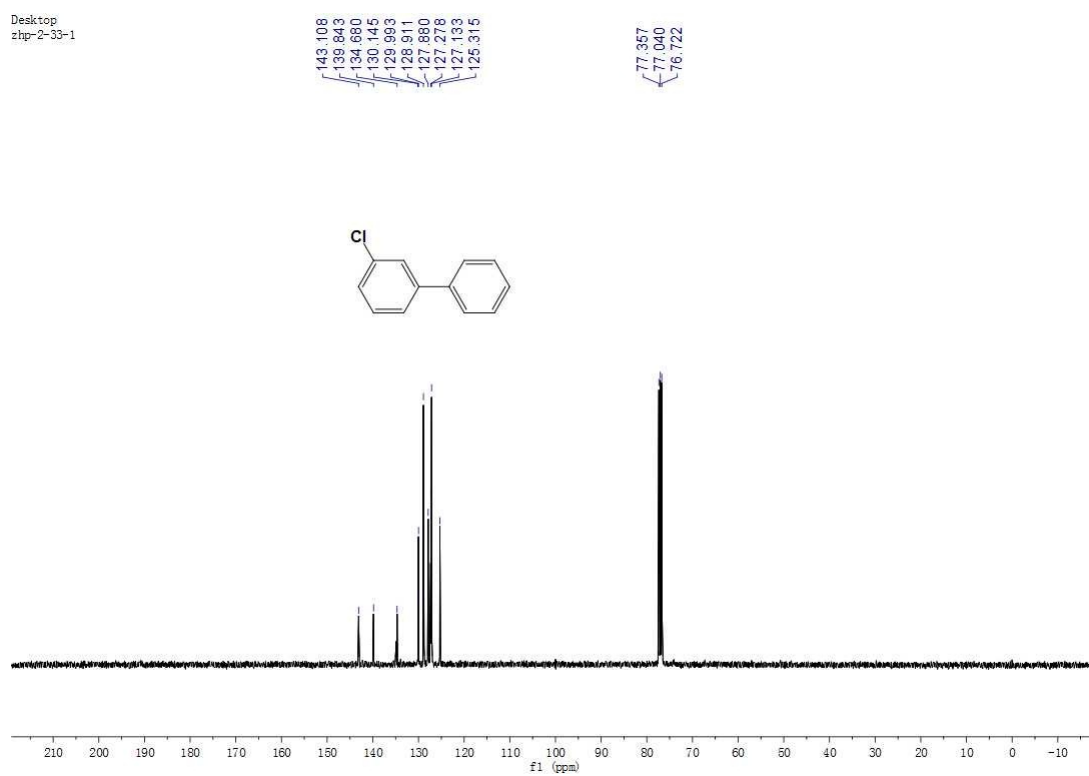

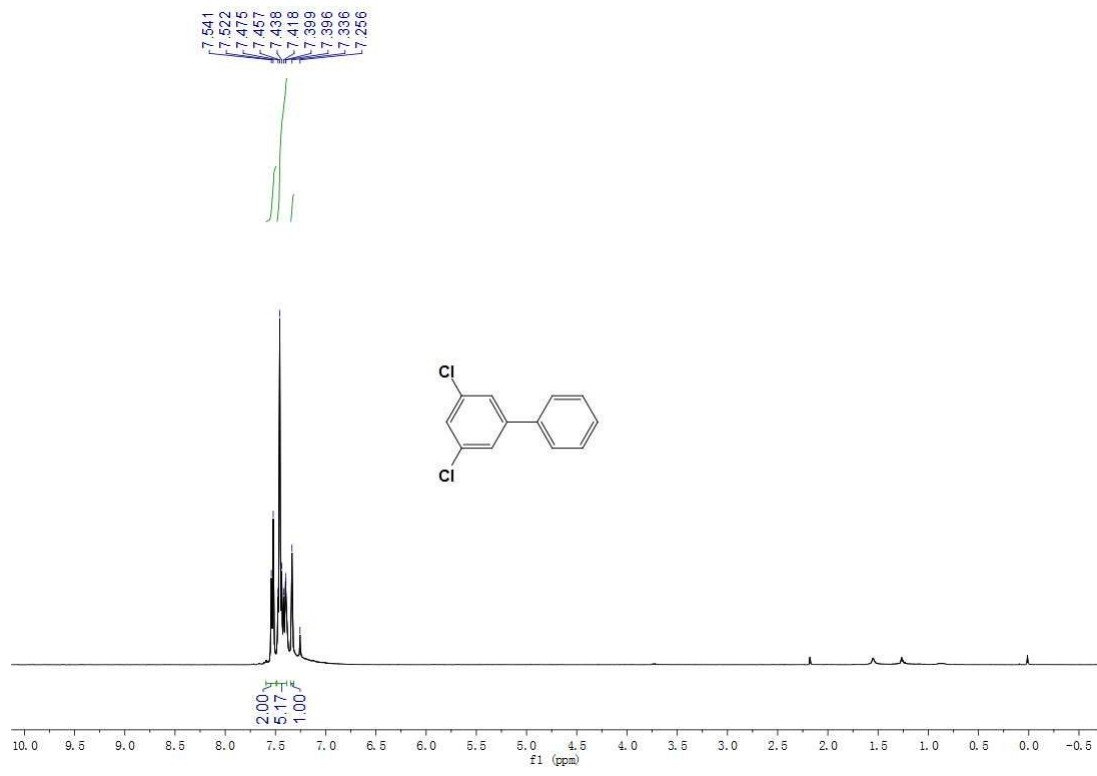

zhouheping  
zhp-2-35-1

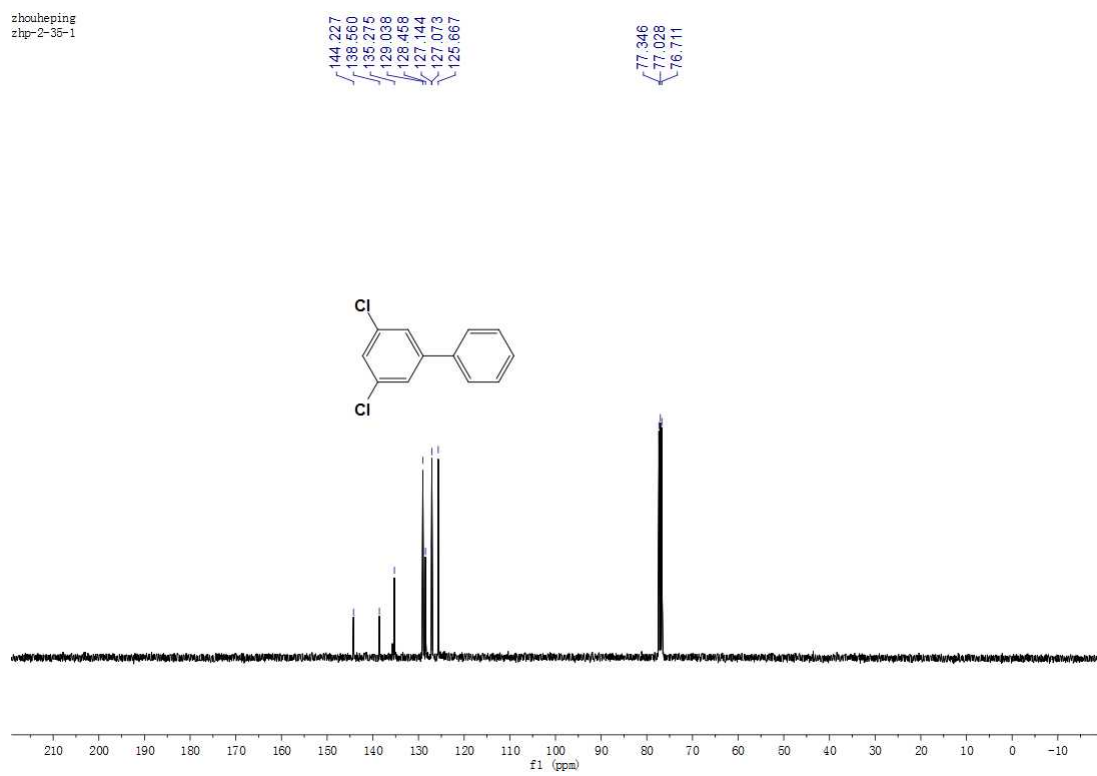

zhp  
zhp-2-26-1

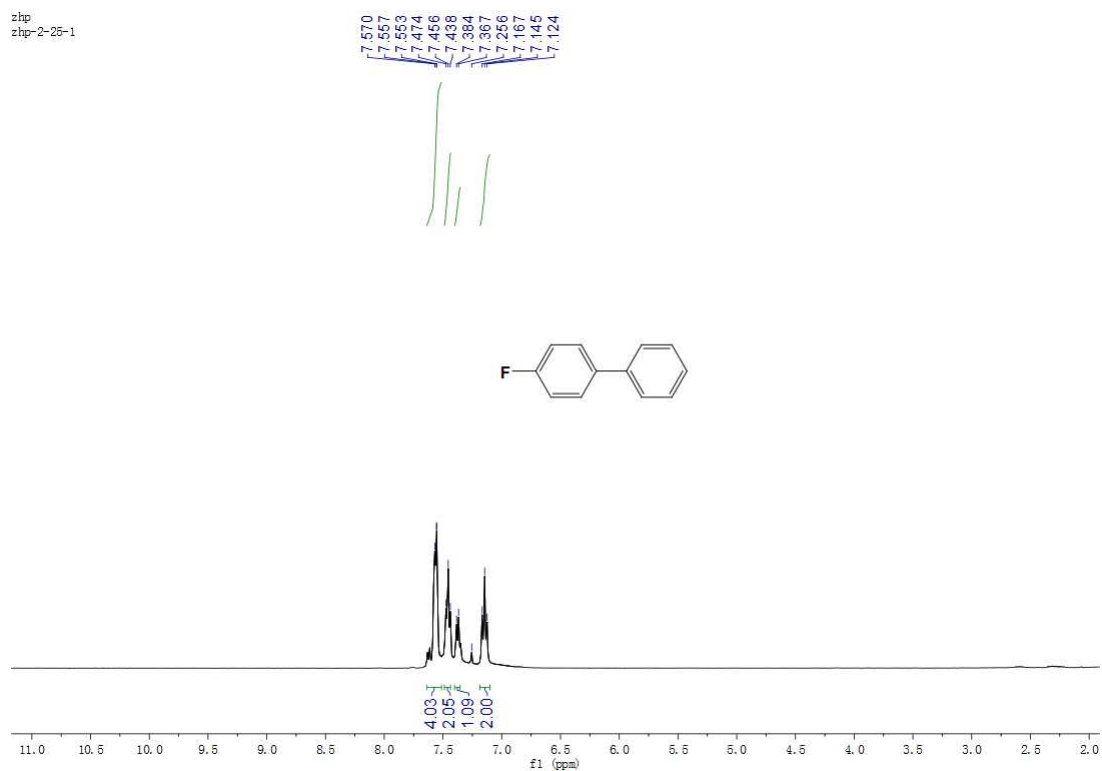

zhouheping  
zhp-2-26-1

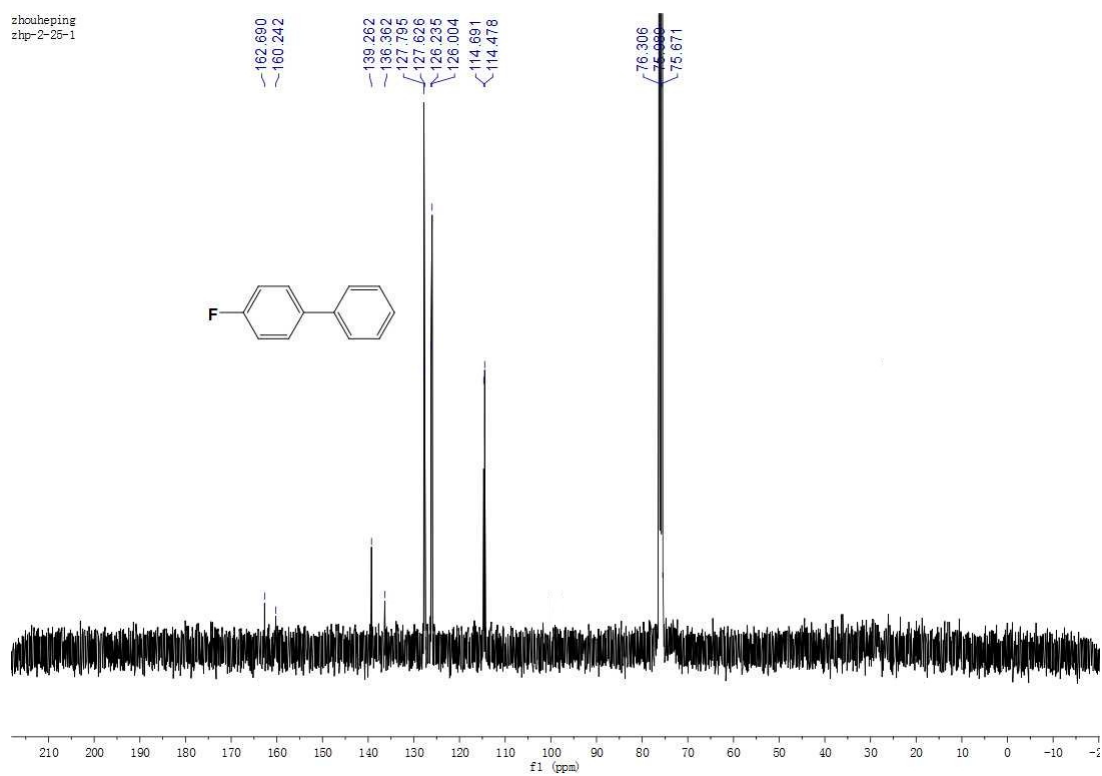

zhp  
zhp-26-1

7.555  
7.538  
7.474  
7.457  
7.438  
7.413  
7.396  
7.256  
7.111  
7.095  
7.069  
7.054  
6.867  
6.845  
6.823  
6.784

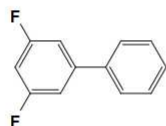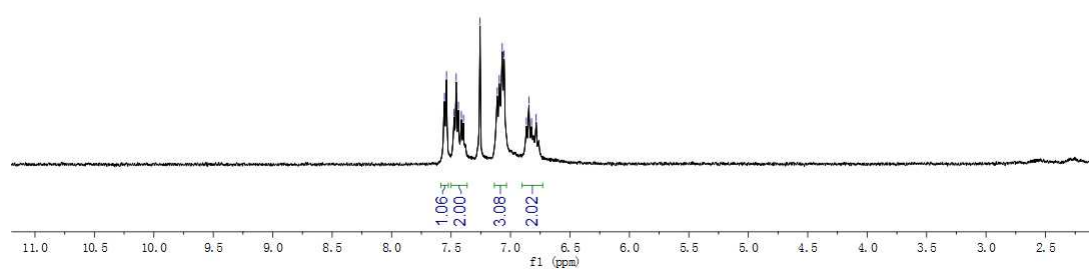

Desktop  
zhp-3-11-1

164.862  
164.532  
162.198  
162.068  
144.703  
144.609  
144.515  
138.933  
129.025  
128.461  
127.014  
110.069  
109.999  
109.884  
109.814  
102.730  
102.477  
102.224  
77.369  
77.061  
76.734

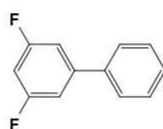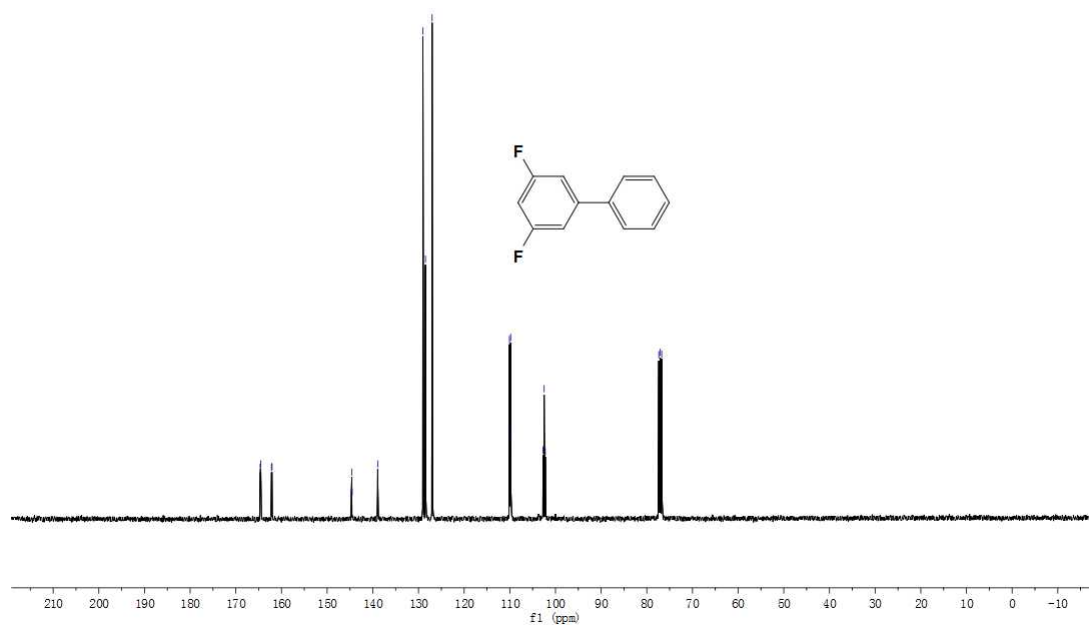



zhp  
zhp-27-1

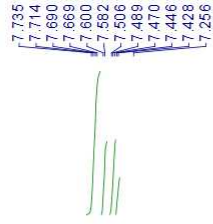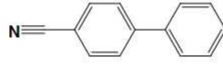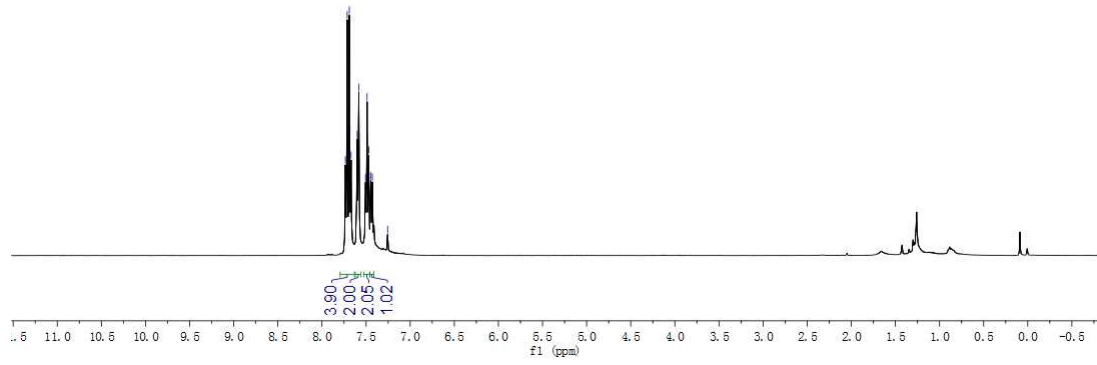

Desktop  
zhp-3-4-1

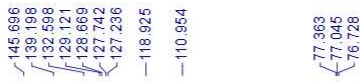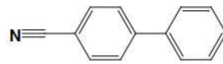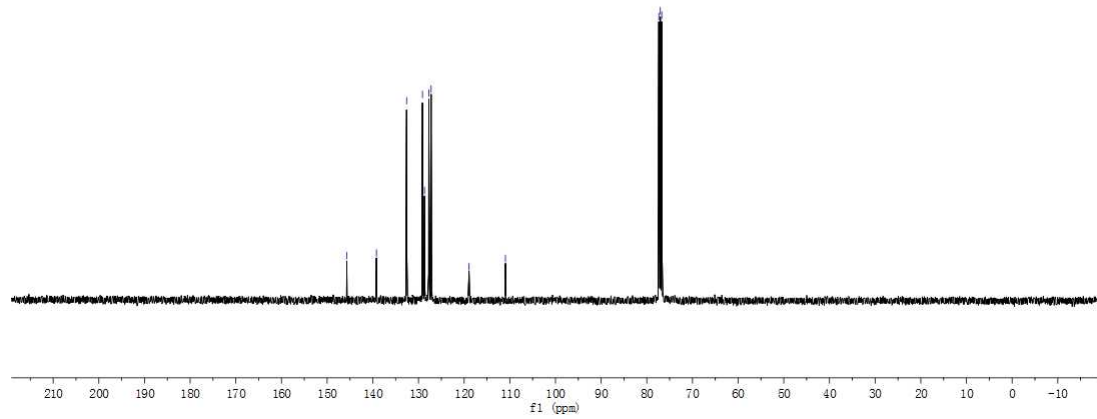

Desktop  
zhp-1-35-3

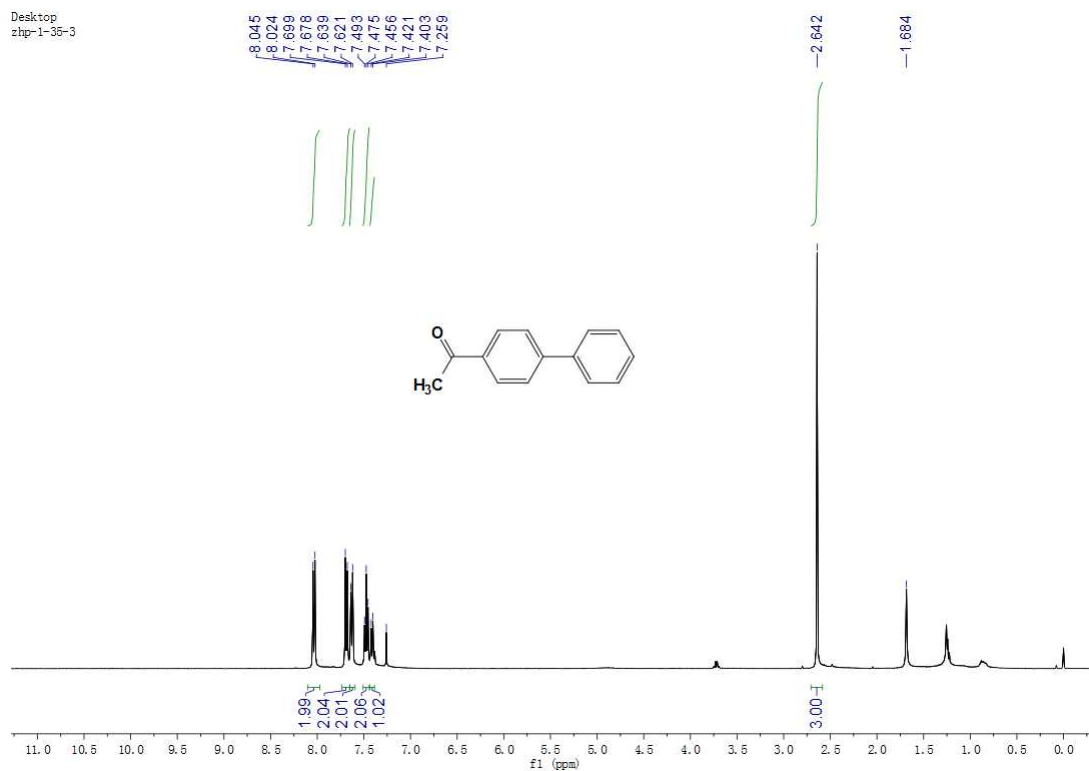

NMR  
zhp-1-35-3

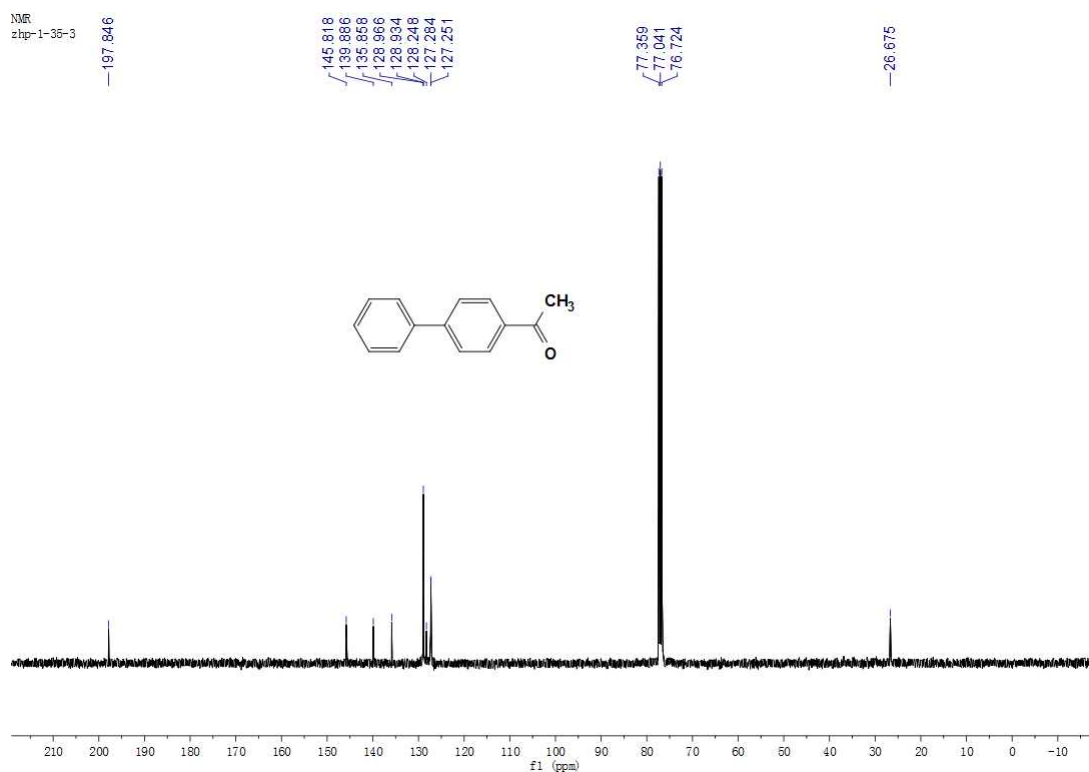

zhp  
zhp-2-28-1

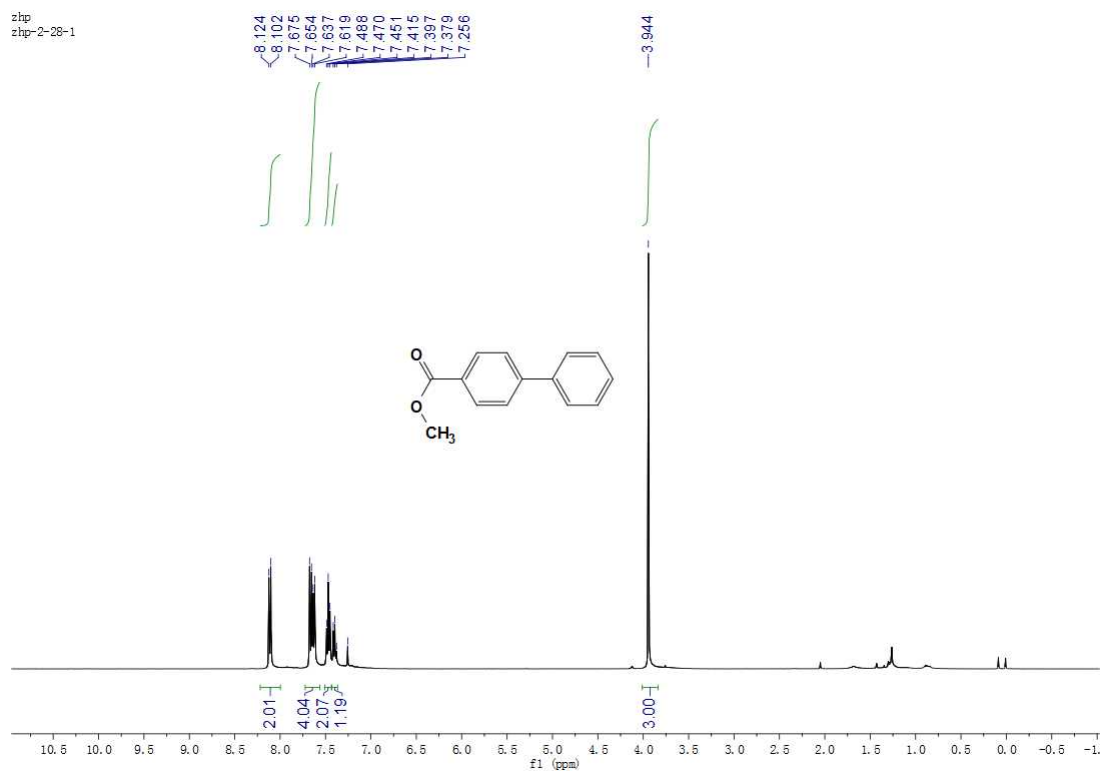

Desktop  
zhp-3-5-1

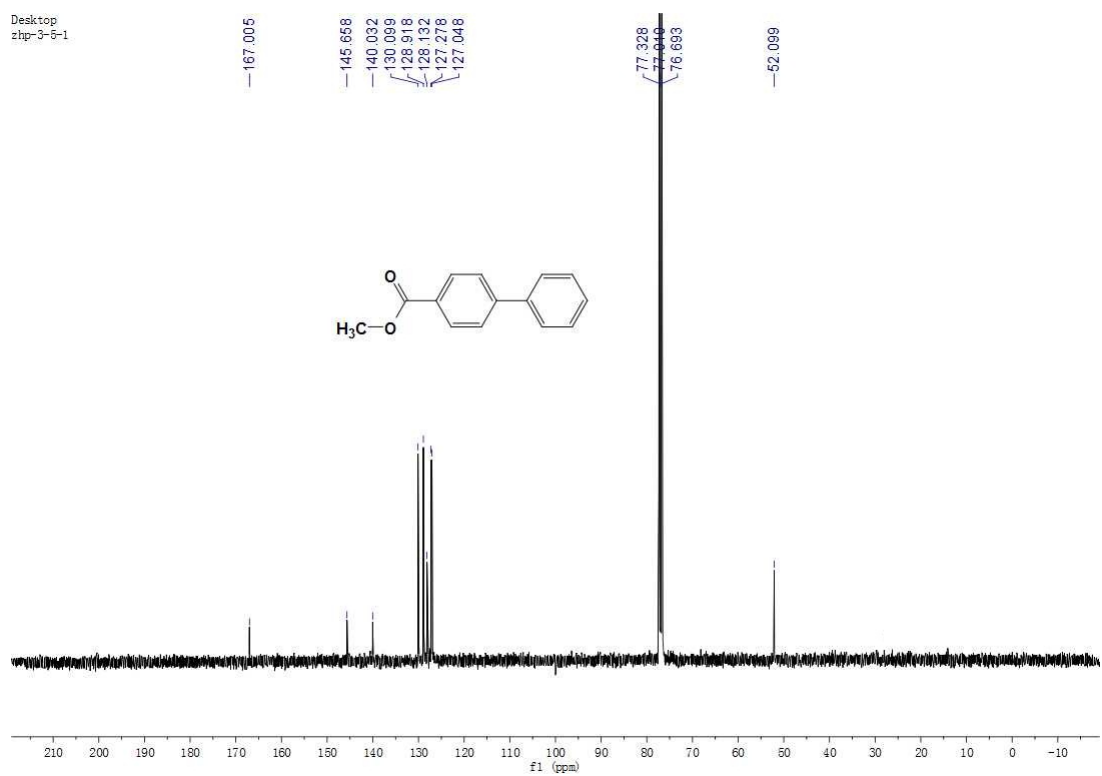

Desktop  
zhp-1-35-1

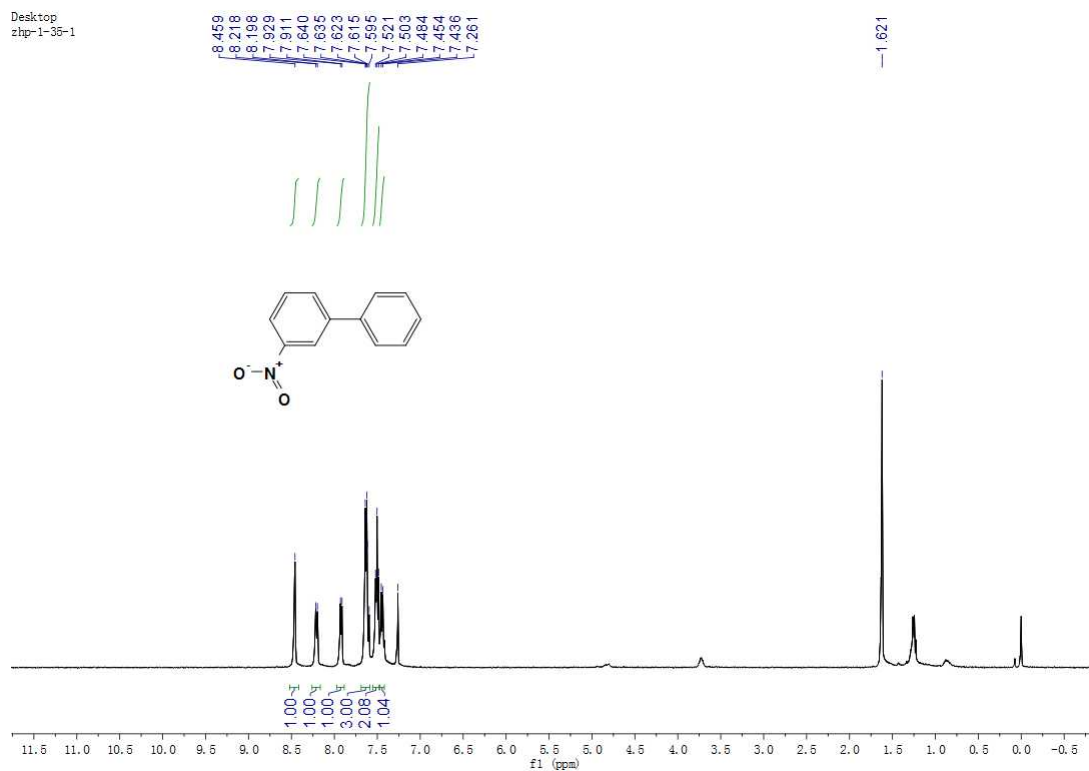

zhouheping  
zhp-1-35-1

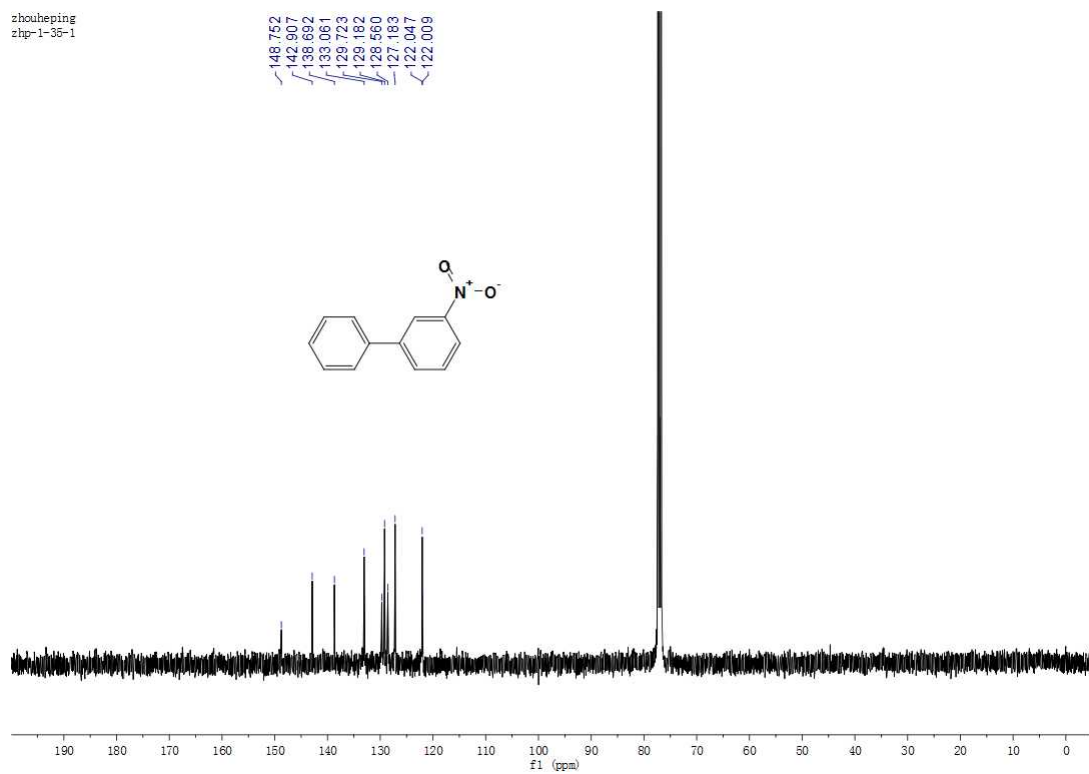

Desktop  
zhp-2-43-1

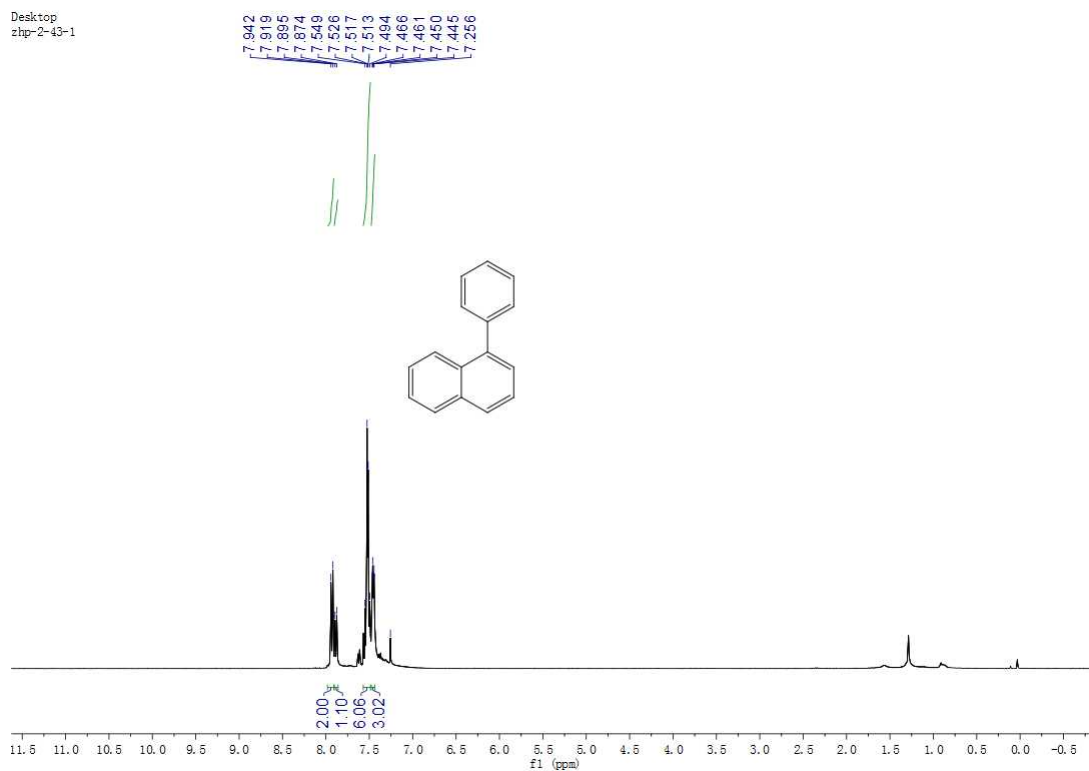

Desktop  
zhp-3-3-1

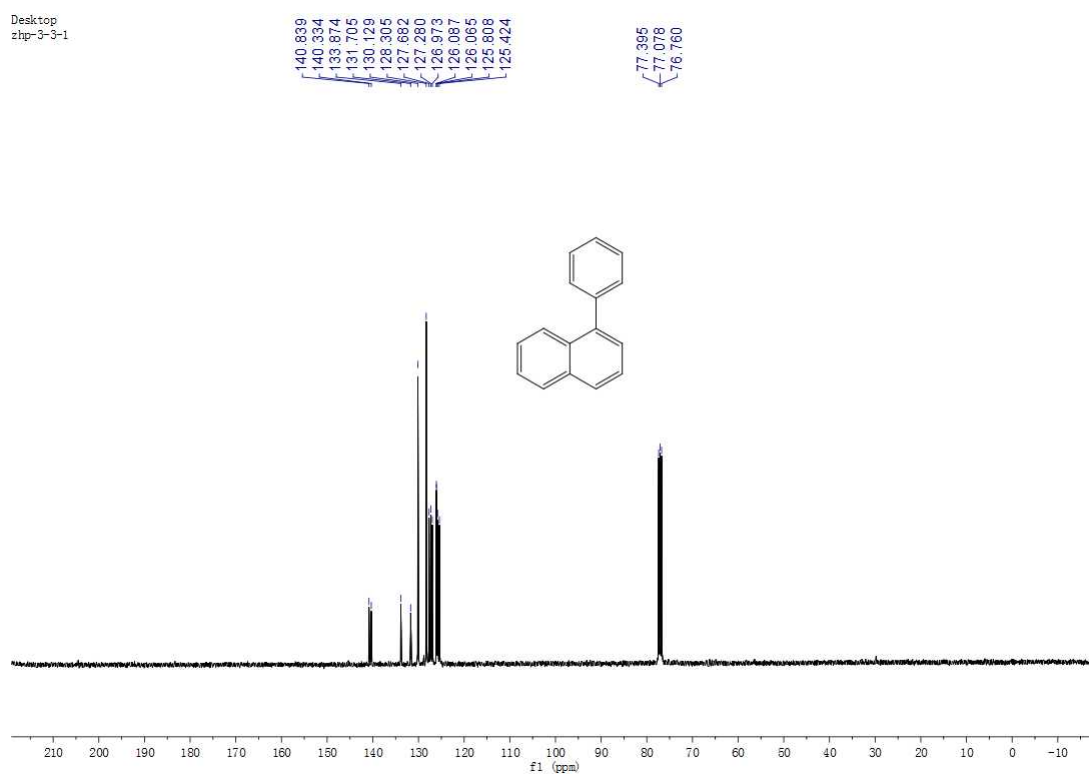

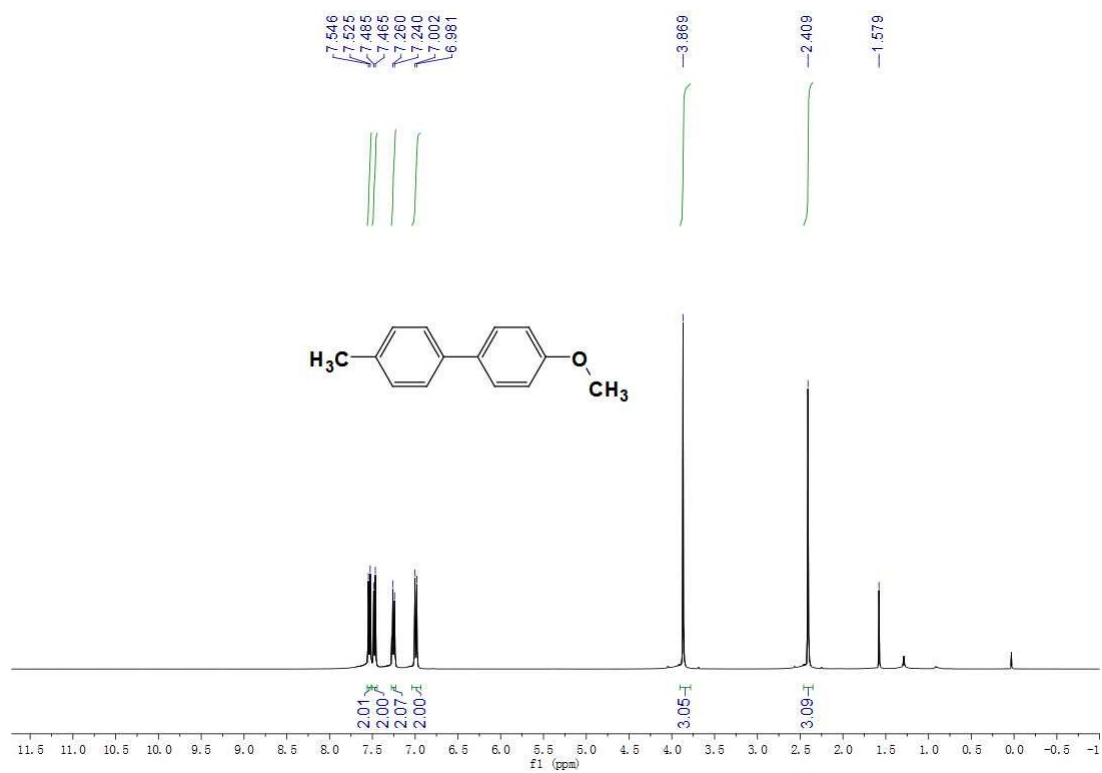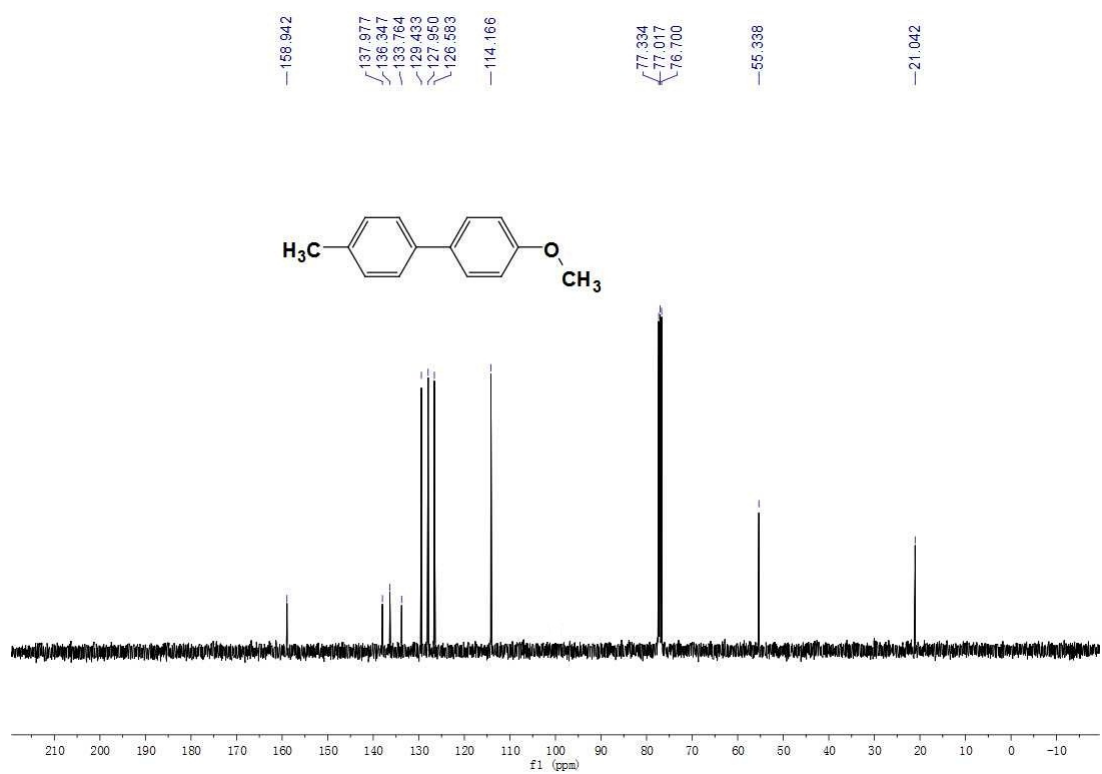

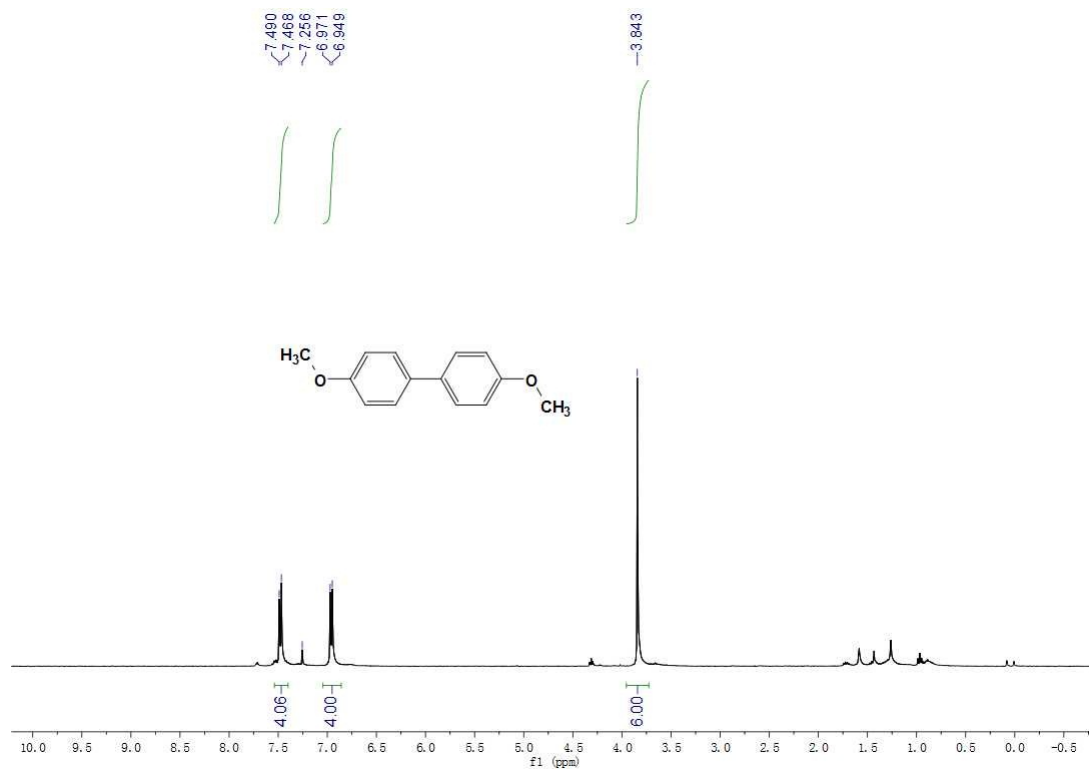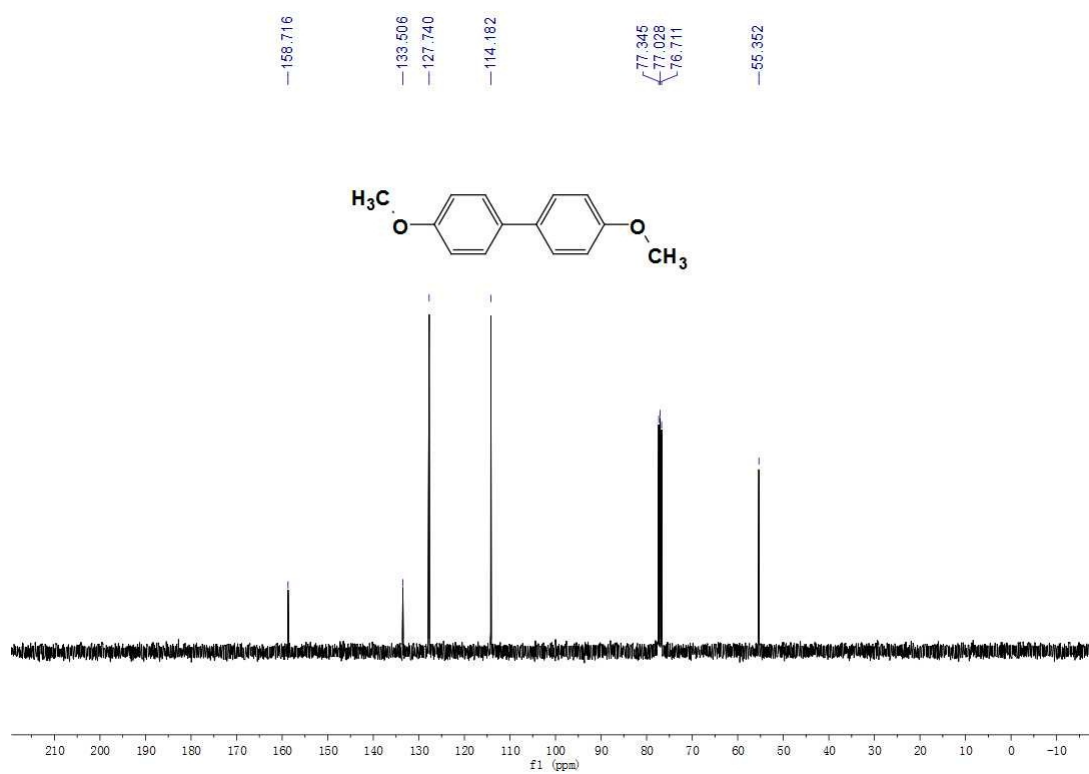

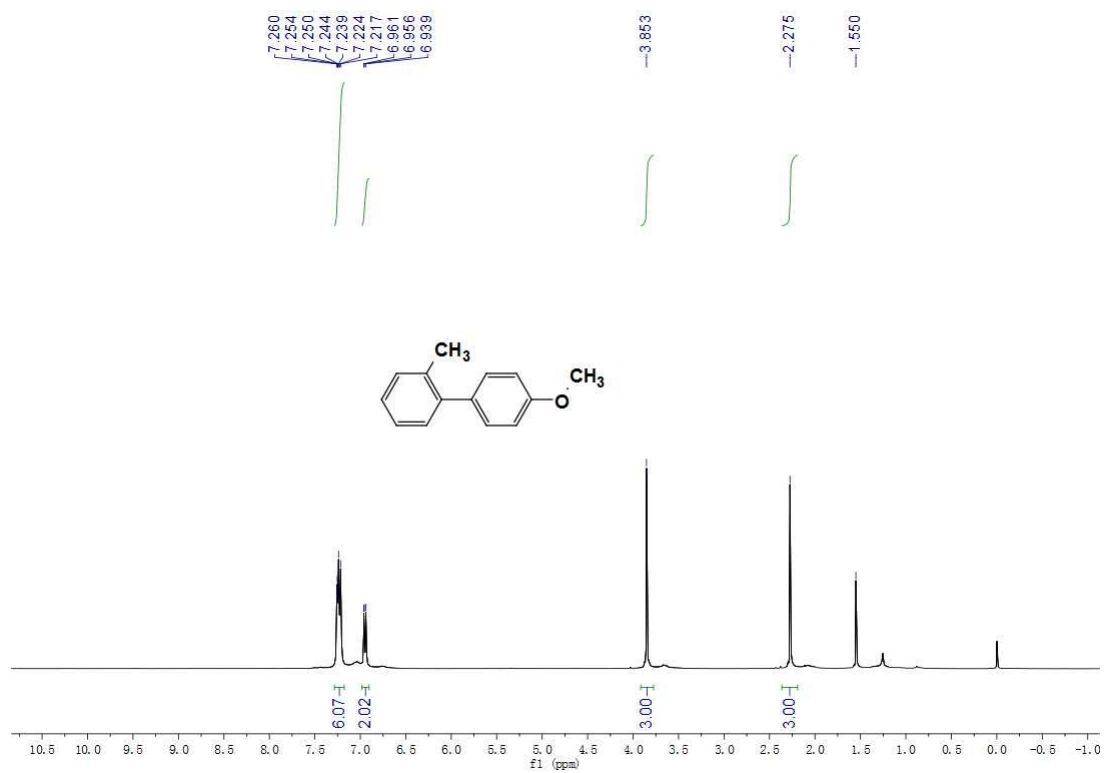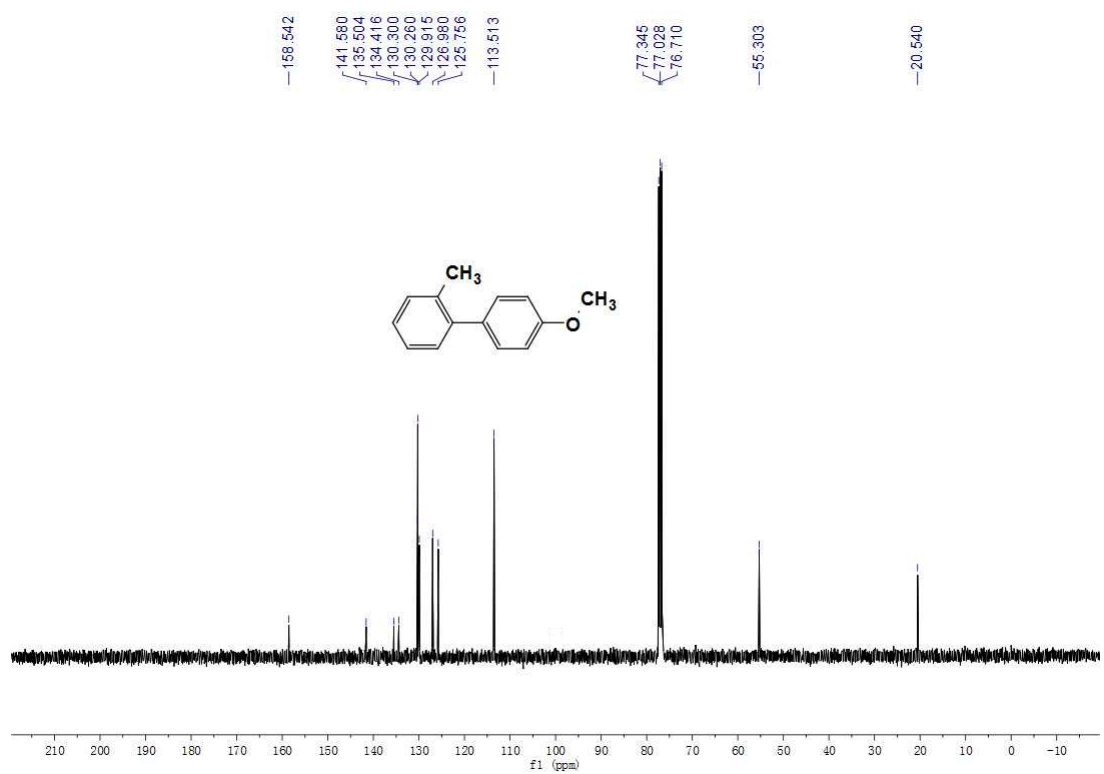



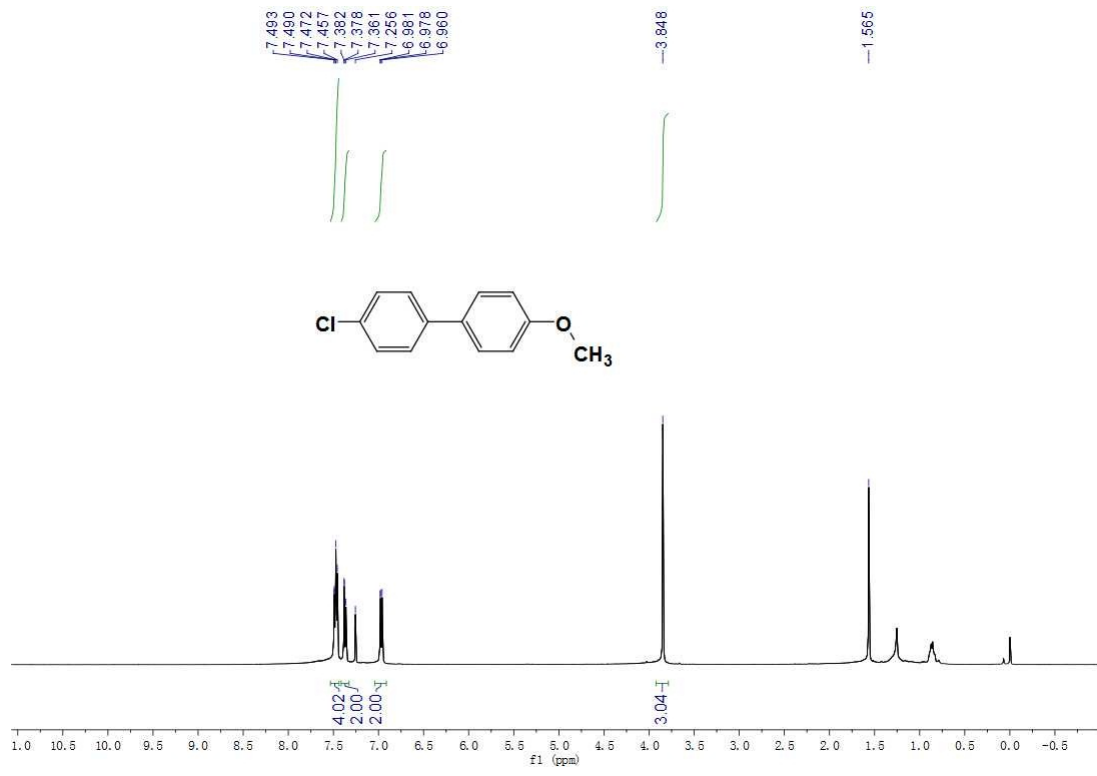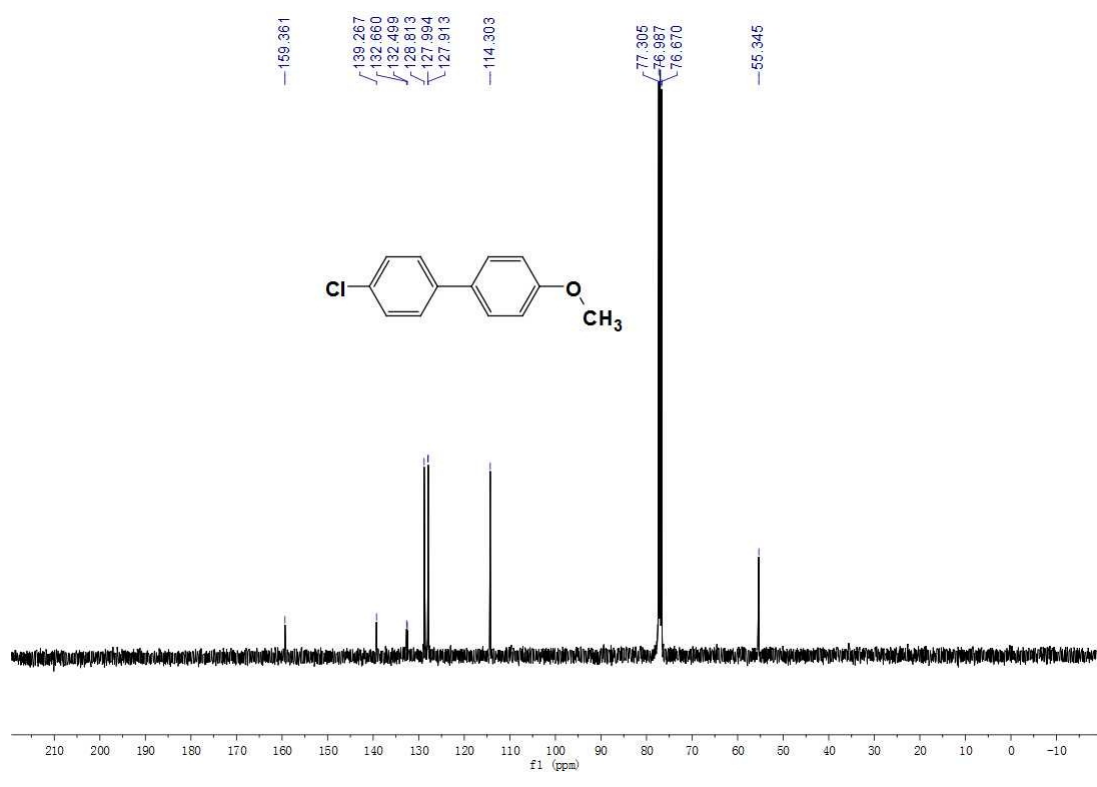

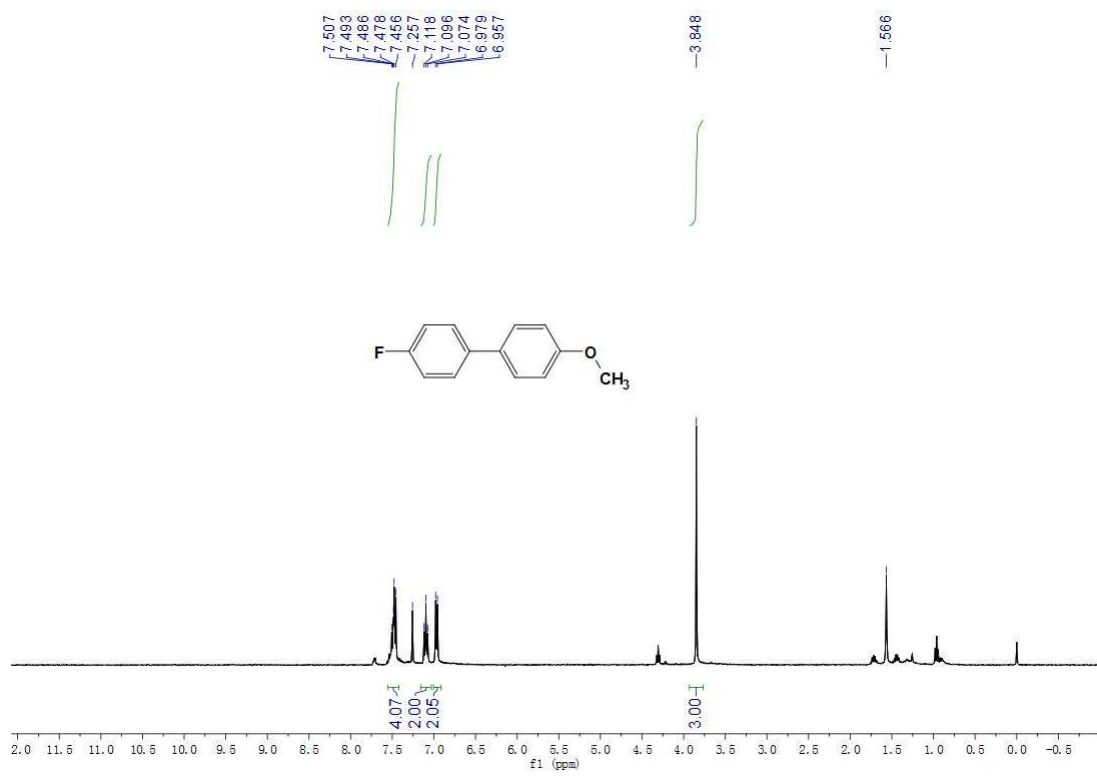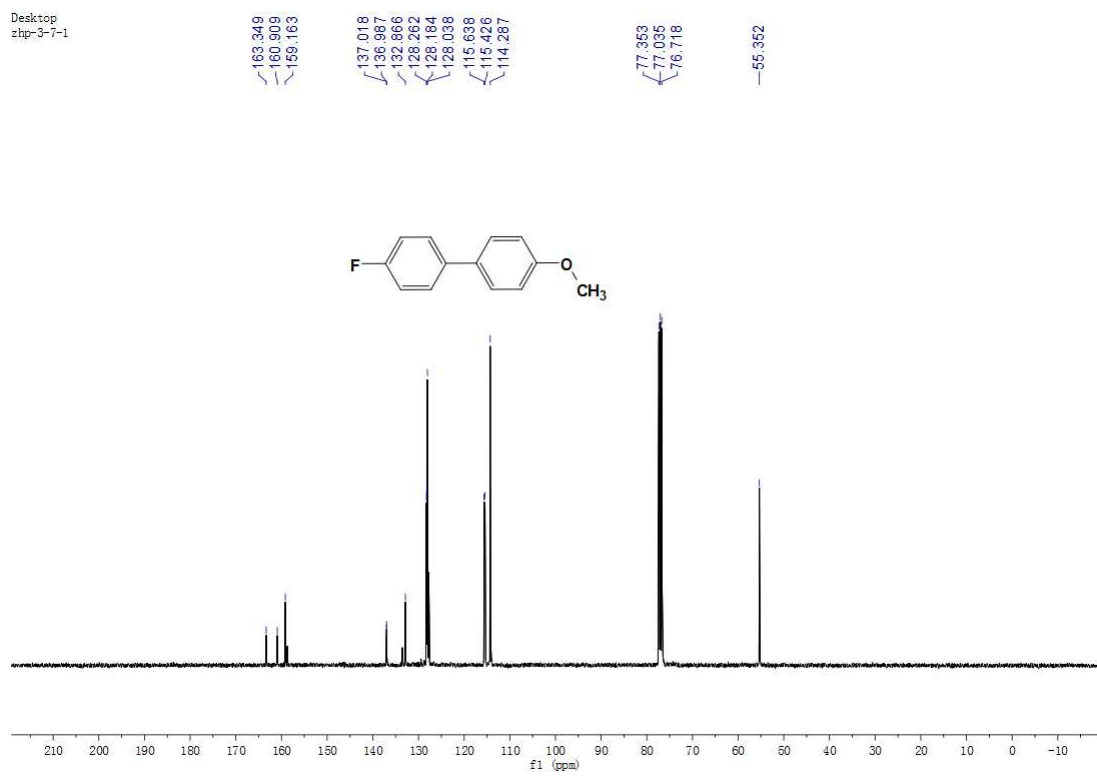

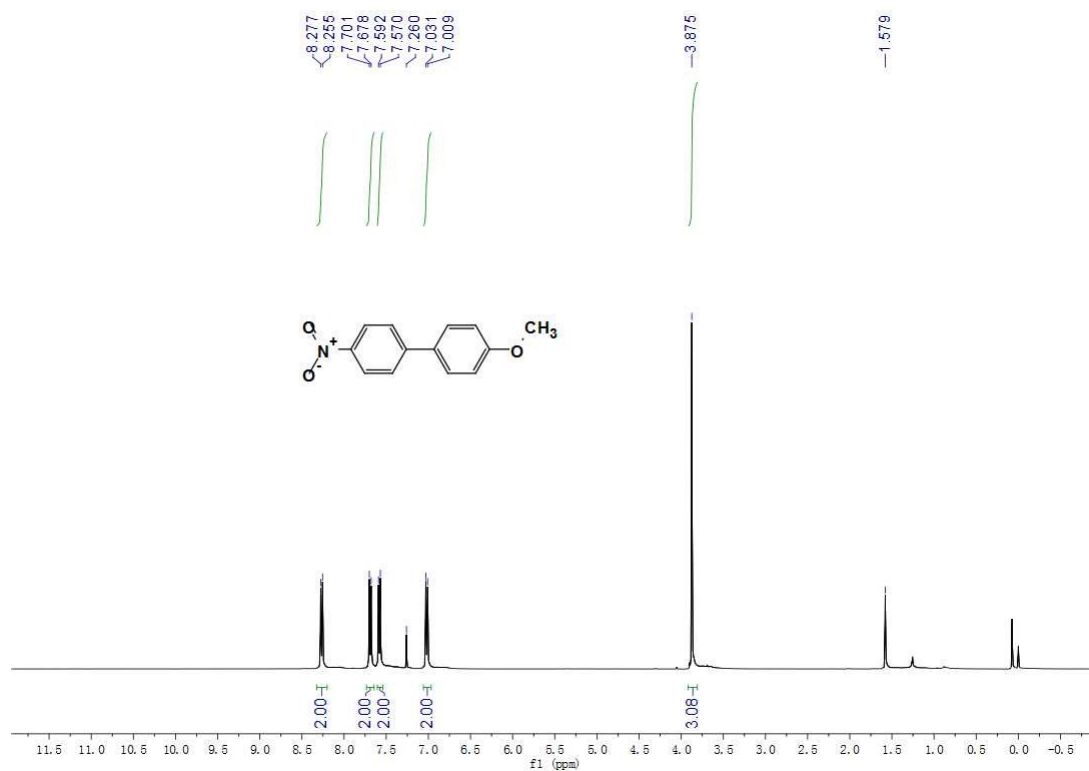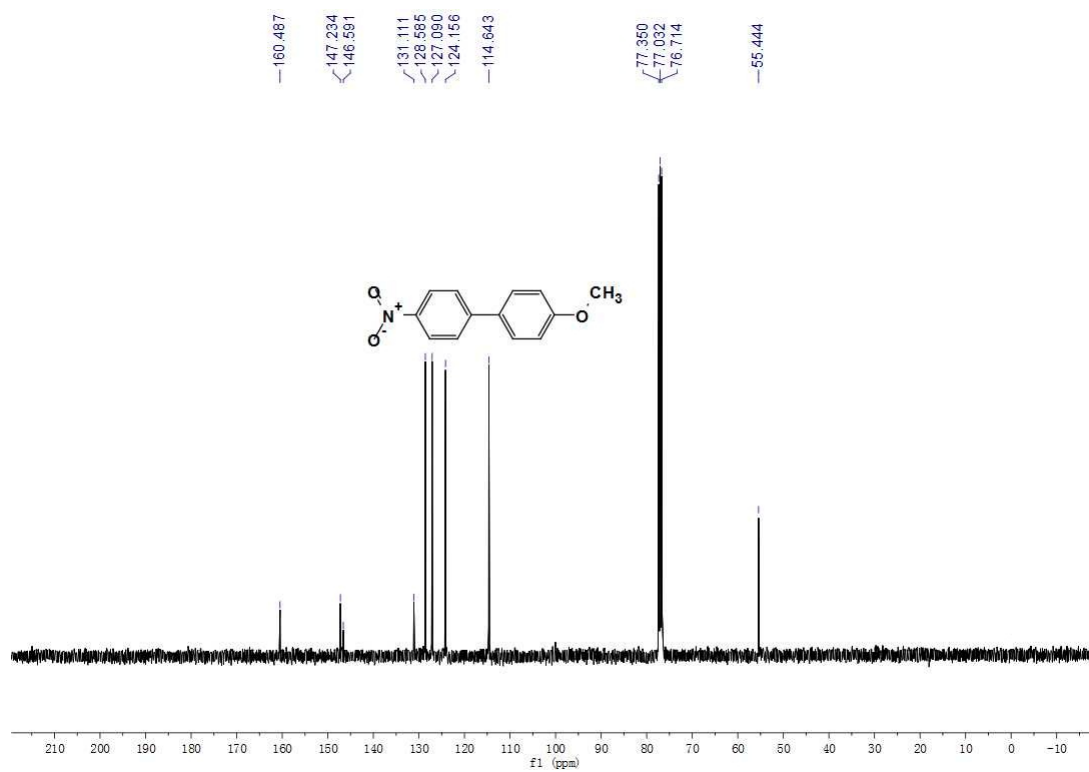

Supplement: c4ra03421j1.pdf [file c4ra03421j1.pdf]
